# Supplementary material
Source: PubMed Central journal article supplement (PMC3671353)
Supplement: NIHMS428973-supplement-Supplement.pdf [file NIHMS428973-supplement-Supplement.pdf]

## **Supplement**

This supplement describes the application of the 3-stage approach to create a genetic risk score (GRS) for obesity. The supplement is organized into 3 sections: The first section describes the creation of the obesity GRS: Stage 1. Extraction; Stage 2. Clustering; and Stage 3. Selection. The second section describes analyses comparing the resulting GRS to GRSs created with the best-guess and top-hits approaches. The final section describes sensitivity analyses to test heterogeneity in GRS associations.

### **PART 1. CREATING THE OBESITY GRS**

#### **Stage 1. Extraction**

For our 3-stage approach analyses, we considered GWAS of European-descent samples that targeted 4 phenotypes: obesity, weight, waist circumference, and body mass index (BMI) (hereafter “obesity-related phenotypes”). A search of the NHGRI GWAS Catalog using the HuGE Navigator (<http://www.hugenavigator.org>) identified 16 GWAS that met these inclusion criteria, 9 of which were published by December 31, 2008 (**Supplementary Table 1**).

In Stage 1 (Extraction), we compiled association results reported in the manuscripts and supplementary materials of the GWAS and extracted rs-numbers and p-values for SNPs associated with any of the 4 phenotypes in the discovery or combined discovery and replication samples at an alpha level of  $1 \times 10^{-5}$  ( $n=103$  SNPs in the subset of 9 GWAS,  $n=519$  SNPs in the full set of 16 GWAS, **Supplementary Table 2**). The significance level of  $p < 1 \times 10^{-5}$  was the most generous threshold at which most GWAS published results and is the threshold used in the NHGRI GWAS Catalog (Hindorff et al. 2009). Associations were not extracted from replication samples because few GWAS reported novel associations identified in replication samples and some GWAS did not include replication samples or included replication samples of different ethnicity. Discovery sample risk SNPs that failed to replicate within an individual GWAS were included because replication was evaluated at the level of the GWAS publication rather than the specific test sample.

#### **Stage 2. Clustering**

In Stage 2 (Clustering), we grouped the extracted SNPs into “LD blocks.” We defined LD blocks using data from the HapMap CEU sample (Phase 3), queried using Seattle SNPs’ web-based Genome Variation Server (<http://gvs.gs.washington.edu/GVS>). For each SNP extracted in Stage 1 (“seeds”), we defined an LD block as the region containing all SNPs in LD with that seed at a threshold of  $R^2 \geq 0.95$ . Then, beginning

with the block closest to the start of each chromosome, we pruned blocks that did not contain a unique seed. This process yielded  $n=66$  LD blocks from the subset of 9 GWAS published by December 31, 2008 and  $n=158$  LD blocks from the full set of 16 GWAS.

### Stage 3. Selection

In Stage 3 (Selection), we retained LD blocks that we classified as genome-wide significant or as replicated. Genome-wide significant LD blocks were those that contained  $\geq 1$  SNP associated with an obesity-related phenotype at  $p < 1 \times 10^{-8}$ . Replicated blocks were those that contained SNPs extracted from  $\geq 2$  GWAS. This process yielded  $n=37$  LD blocks clustered around 11 loci on chromosomes 1-4,9,11,12,16,18, and 19 from the subset of 9 GWAS and  $n=69$  LD blocks clustered around 32 loci on chromosomes 1-6,9,11-14,16,18, and 19 from the full set of 16 GWAS (**Supplementary Tables 3, 4**). Sensitivity analyses relaxing the LD threshold used to define LD blocks yielded fewer LD blocks (e.g., for the full set of 16 GWAS,  $n=58$  at an  $R^2$  threshold of 0.70), but did not alter the loci identified as genome-wide significant or replicated in the original analyses.

## PART 2. COMPARING THE 3-STAGE APPROACH GRSS TO THE TOP-HITS AND BEST-GUESS GRSS

To construct and test our GRSSs, we followed-up the LD blocks identified in our 3-stage approach analyses in the GWAS dataset from the Atherosclerosis Risk in Communities (ARIC) Study. This dataset is publicly available through the National Institutes of Health Database of Genotypes and Phenotypes (dbGaP) (<http://www.ncbi.nlm.nih.gov/gap>, phs000090.v1.p1) and is described in the Data section of the main text.

We selected SNPs in the ARIC database to include in our two GRSSs as follows: We defined tag SNPs for each of the LD blocks as SNPs that were in LD with every seed contained in the block at  $R^2 \geq 0.95$ . We then matched 1 tag SNP per LD block with a SNP in the ARIC study genotype database that met the GENEVA ARIC Project Team's quality control criteria (GENEVA ARIC Project 2009). If no tag SNPs in an LD block could be matched in the ARIC database, we relaxed the LD threshold used to define a tag SNP until either a) the resulting set of tag SNPs overlapped with tag SNPs that we had already matched in the ARIC database, or b) a match with a new SNP in the ARIC database was achieved. These analyses yielded a set of  $n=28$  SNPs from the subset of 9 GWAS and a set of  $n=57$  SNPs from the full set of 16 GWAS.

To compute the 3-stage approach GRSs for each ARIC participant, we (1) identified the obesity-associated allele for each SNP from the GWAS where that SNP was reported; (2) calculated the mean number of risk alleles at each locus; and (3) summed these means across loci to produce the 3-stage approach genome-wide scores.

To compute the top-hits and best-guess approach GRSs, we selected SNPs from the ARIC database to match SNPs from 3 published GRSs (Li et al. 2010; Peterson et al. 2011; Speliotes et al. 2010) and the full set of obesity-associated SNPs listed in the NHGRI GWAS catalog for GWAS of European-descent samples. In cases where a specific SNP was not available in the ARIC database, we selected its closest LD proxy. We then summed obesity-associated alleles across each set of selected SNPs to create the comparison genome-wide scores.

To test if the 3-stage approach could construct a GRS that was at least as predictive of BMI and obesity as GRSs created with the top-hits and best-guess approaches, we compared effect sizes for different GRSs using the ARIC data. All GRSs were standardized to have mean=0 and standard deviation=1. To measure GRS effect sizes for BMI, we estimated Pearson correlations ( $r$ ) from separate linear regressions of BMI on each of the GRSs. To measure GRS effect sizes for obesity, we estimated odds ratios (OR) from separate logistic regressions of obesity on each of the GRSs. Regression models were adjusted for age (linear and quadratic terms), gender, the age-gender interaction, and the ARIC Study Centers where data were collected (hereafter these statistical adjustments are described as “demographics and geography”). To test differences between GRS effect sizes, we conducted F-tests (for effect sizes estimated from linear regressions) and Wald tests (for effect sizes estimated from logistic regressions). For these tests, models including each of the GRSs being compared were jointly estimated using the seemingly unrelated regression method. Seemingly unrelated regression is a statistical approach for comparing coefficients from non-nested regression models (Baltagi 1980; Verzilli, Stallard, and Whittaker 2005). Effect sizes were similar for all GRSs. Statistical tests indicated that our 3-stage approach GRSs performed as well as or better than GRSs created using top-hits and best-guess approaches (**Supplementary Table 5**). Thus, the 3-stage approach produced a GRS that was at least as predictive as top-hits and best guess approach GRSs. We used the 3-stage approach GRS created from the full set of 16 GWAS (hereafter the “Obesity GRS”) in subsequent analyses.

**Refining the 3-Stage Approach GRS for Obesity.** At 7 of the 32 loci identified in the 3-stage approach analyses of GWAS results (in or near the genes *TMEM18*, *ETV5*, *BDNF*, *MTCH2*, *FTO*, *MC4R*, and *KCTD15*), multiple LD blocks met selection criteria (genome-wide significance or replication). To

refine the 3-stage approach GRS, we asked whether the genotype for a single SNP could be used instead of the mean number of risk alleles at a locus. First, we identified the BMI-increasing allele for each SNP and calculated the linear association between the number of BMI-increasing alleles for that SNP and BMI measured at the first ARIC study visit. We next compared test-statistics and effect sizes between SNPs at each locus to identify the “lead-SNP”, the SNP with the strongest association, and the worst-associated SNP. We then compared the effect size for the lead-SNP to the effect sizes for the worst-associated SNP and for the mean number of risk alleles across SNPs at the locus. These analyses asked 1) whether there was any difference in the signal from the different SNPs in a correlated set; and 2) whether a single SNP could provide an adequate summary of obesity-associated variation at the locus. Models were fitted using linear regression with statistical adjustment for demographics and geography. We compared effect sizes using the seemingly unrelated regression method (Baltagi 1980; Verzilli, Stallard, and Whittaker 2005). **Supplementary Table 6** shows results from this analysis. At all loci, the lead SNP, worst-associated SNP, and mean number of risk alleles performed similarly, with the exception of the *FTO* locus, at which the lead SNP rs9939609 performed slightly better than the worst-associated SNP rs1477196. Finally, we tested whether including multiple SNPs at a locus improved the prediction of BMI in a regression model. Analyses were conducted using the variable selection algorithm in the Stata program mfp (Royston and Ambler 1999). Details of this method are reported elsewhere (Royston and Sauerbrei 2003). Briefly, SNPs were added to a baseline model predicting BMI as a function of age, sex, and geography in order of decreasing statistical significance of the SNPs’ bivariate association with BMI. SNPs were retained in the model if their inclusion resulted in a statistically significant ( $p < 0.05$ ) decrease in model deviance. Results showed that model fit was not improved by the inclusion of multiple SNPs at any locus. Therefore, we retained only the best-associated SNPs from each of the 7 loci, resulting in a 32-SNP GRS (**Supplementary Table 7**).

### **PART 3. SENSITIVITY ANALYSES TO TEST HETEROGENEITY IN GRS ASSOCIATIONS**

We tested the linearity of GRS-BMI associations using quadratic and cubic specifications of the GRS in linear regression models. Coefficients for the higher order (i.e. squared and cubic) GRS terms were not statistically significant ( $p > 0.10$  for all), indicating that the GRS-BMI association was approximately linear. We tested the measurement specificity of GRS-BMI associations by comparing GRS effect sizes for BMI to GRS effect sizes for weight and for waist circumference using the seemingly unrelated regression method (Baltagi 1980). GRS coefficients were similar across all three models

( $p > 0.10$  for tests of differences), indicating that the GRS predicted not just BMI, but related measures of body size and adiposity. We tested whether GRS-BMI associations were different for men and women or for older as compared to younger individuals using product terms in linear regression models. Coefficients for product terms were not statistically significant ( $p > 0.10$  for all), indicating that GRS-BMI associations were similar for men and women and across early to late mid-life. Finally, we tested whether GRS-BMI associations differed across the 4 in-person assessments in the ARIC Study using the seemingly unrelated regression method. GRS effect sizes were similar across all 4 assessments ( $p > 0.10$  for all comparisons), indicating that GRS-BMI associations were consistent across measurement intervals.

In Press - Biodemography & Social Biology

**Supplementary Table 1. Genome Wide Association Studies Included In 3-Stage Approach Analyses.**

GWAS information comes from the NHGRI GWAS Catalog ([www.genome.gov](http://www.genome.gov)). Risk SNPs were defined as any SNP associated with an obesity-related phenotype (BMI, weight, waist circumference, categorical obesity) at  $p < 10^{-5}$  in the discovery or combined discovery and replication samples of the GWAS.

\*Italicized counts include imputed genotypes; \*\*Lindgren et al. also investigated associations with waist circumference, and these are the association tests included in the SNP selection analysis; \*\*\*Scherag et al. also investigated associations with BMI and both phenotypes were included in the SNP selection analysis. Citations for the GWAS are included as (Cotsapas et al. 2009; Fox et al. 2007; Frayling et al. 2007; Heard-Costa et al. 2009; Herbert et al. 2006; Hinney et al. 2007; Johansson et al. 2010; Lindgren et al. 2009; Liu et al. 2010; Liu et al. 2008; Loos et al. 2008; Meyre et al. 2009; Scherag et al. 2010; Scuteri et al. 2007; Speliotes et al. 2010; Thorleifsson et al. 2009; Willer et al. 2009).

|                          | GWAS Chip<br>Manufacturer            | SNPs<br>Genotyped* | SNPs in GWAS Catalog |                                  | Risk SNPs Included in |
|--------------------------|--------------------------------------|--------------------|----------------------|----------------------------------|-----------------------|
|                          |                                      |                    | SNPs                 | Phenotypes                       | Analyses              |
| Herbert et al. 2006      | Affymetrix                           | 86,604             | 0                    | Obesity                          | 0                     |
| Frayling et al. 2007     | Affymetrix                           | 490,032            | 1                    | BMI                              | 1                     |
| Scuteri et al. 2007      | Affymetrix                           | 362,129            | 1                    | BMI, Weight                      | 12                    |
| Fox et al. 2007          | Affymetrix                           | 70,897             | 5                    | BMI, Waist<br>Circumference      | 12                    |
| Hinney et al. 2007       | Affymetrix                           | 440,794            | 1                    | Obesity (early onset<br>extreme) | 15                    |
| Liu et al. 2008          | Affymetrix                           | 379,319            | 0                    | Obesity                          | 3                     |
| Loos et al. 2008         | Affymetrix                           | 344,883            | 2                    | BMI                              | 10                    |
| Thorleifsson et al. 2009 | Illumina                             | 305,846            | 18                   | BMI, Weight                      | 47                    |
| Willer et al. 2009       | Affymetrix &<br>Illumina             | 2,399,588          | 11                   | BMI                              | 24                    |
| Meyre et al. 2009        | Illumina                             | 308,846            | 5                    | Obesity                          | 32                    |
| Cotsapas et al. 2009     | Illumina                             | 457,251            | 13                   | Obesity (extreme)                | 15                    |
| Lindgren et al. 2009     | Affymetrix &<br>Illumina             | 2,573,738          | NA                   | Adiposity**                      | 10                    |
| Heard-Costa et al. 2009  | Affymetrix &<br>Illumina             | 512,349            | 7                    | Waist Circumference              | 320                   |
| Johansson et al. 2009    | Illumina                             | 318,237            | 17                   | BMI, Weight                      | 26                    |
| Liu et al. 2010          | Illumina                             | 559,712            | 2                    | BMI                              | 3                     |
| Scherag et al. 2010      | Affymetrix &<br>Illumina             | 1,596,878          | 2                    | Obesity<br>(extreme)***          | 13                    |
| Speliotes et al. 2010    | Affymetrix,<br>Illumina,<br>Perlegen | ~2.8 million       | 38                   | BMI                              | 42                    |

**Supplementary Table 2. Risk SNPs and Source Publications: All SNPs reported as associated with Obesity, BMI, Weight, or Waist Circumference at  $p < 1 \times 10^{-5}$  in Discovery or Combined Discovery and Replication Samples**

| Risk SNP   | Trait               | Publication                     |
|------------|---------------------|---------------------------------|
| rs9939609  | BMI                 | Frayling et al. 2007<br>Science |
| rs1121980  | BMI                 |                                 |
| rs6602024  | BMI                 |                                 |
| rs7193144  | BMI                 |                                 |
| rs8050136  | BMI                 |                                 |
| rs9926289  | BMI                 |                                 |
| rs9930506  | BMI                 | Scuteri et al. 2007             |
| rs9939609  | BMI                 |                                 |
| rs9939973  | BMI                 |                                 |
| rs9940128  | BMI                 |                                 |
| rs4512445* | Waist Circumference |                                 |
| rs7193144  | Waist Circumference |                                 |
| rs8050136  | Waist Circumference |                                 |
| rs1106683  | BMI                 |                                 |
| rs1106684  | BMI                 |                                 |
| rs1333026  | BMI                 |                                 |
| rs10488165 | Waist Circumference |                                 |
| rs10504576 | Waist Circumference |                                 |
| rs1875517  | Waist Circumference | Fox et al. 2007                 |
| rs2206682  | Waist Circumference |                                 |
| rs2223662  | Waist Circumference |                                 |
| rs4469448  | Waist Circumference |                                 |
| rs4471028  | Waist Circumference |                                 |
| rs6996971  | Waist Circumference |                                 |
| rs953536   | Waist Circumference |                                 |
| rs10008032 | Extreme Obesity     |                                 |
| rs1121980  | Extreme Obesity     |                                 |
| rs16998603 | Extreme Obesity     |                                 |
| rs2172478  | Extreme Obesity     |                                 |
| rs2969001  | Extreme Obesity     |                                 |
| rs3783950  | Extreme Obesity     |                                 |
| rs41492957 | Extreme Obesity     |                                 |
| rs6076920  | Extreme Obesity     | Hinney et al. 2007              |
| rs619819   | Extreme Obesity     |                                 |
| rs7193144  | Extreme Obesity     |                                 |
| rs8050136  | Extreme Obesity     |                                 |
| rs9276431  | Extreme Obesity     |                                 |
| rs9939609  | Extreme Obesity     |                                 |
| rs9939973  | Extreme Obesity     |                                 |
| rs9940128  | Extreme Obesity     |                                 |

| Supplementary Table 2 Continued |        |                          |
|---------------------------------|--------|--------------------------|
| Risk SNP                        | Trait  | Publication              |
| rs16986921                      | BMI    |                          |
| rs6013029                       | BMI    |                          |
| rs6020712                       | BMI    | Liu et al. 2008          |
| rs10498767                      | BMI    |                          |
| rs1121980                       | BMI    |                          |
| rs17700633                      | BMI    |                          |
| rs17782313                      | BMI    |                          |
| rs2572106                       | BMI    | Loos et al. 2008         |
| rs2679120                       | BMI    |                          |
| rs4623795                       | BMI    |                          |
| rs7212681                       | BMI    |                          |
| rs7336049                       | BMI    |                          |
| rs748192                        | BMI    |                          |
| rs10501087                      | BMI    |                          |
| rs10783050                      | BMI    |                          |
| rs10913469                      | BMI    |                          |
| rs12970134                      | BMI    |                          |
| rs1776012                       | BMI    |                          |
| rs2568958                       | BMI    |                          |
| rs2867125                       | BMI    |                          |
| rs29941                         | BMI    |                          |
| rs3101336                       | BMI    |                          |
| rs3751812                       | BMI    |                          |
| rs4074134                       | BMI    |                          |
| rs467650                        | BMI    |                          |
| rs4788102                       | BMI    |                          |
| rs4854344                       | BMI    |                          |
| rs4923461                       | BMI    |                          |
| rs6265                          | BMI    |                          |
| rs6499640                       | BMI    |                          |
| rs7138803                       | BMI    |                          |
| rs7190492                       | BMI    |                          |
| rs7336332                       | BMI    |                          |
| rs7481311                       | BMI    |                          |
| rs7498665                       | BMI    |                          |
| rs7561317                       | BMI    | Thorleifsson et al. 2009 |
| rs7647305                       | BMI    |                          |
| rs7647305                       | BMI    |                          |
| rs8044769                       | BMI    |                          |
| rs8049439                       | BMI    |                          |
| rs8050136                       | BMI    |                          |
| rs836964                        | BMI    |                          |
| rs867559                        | BMI    |                          |
| rs925946                        | BMI    |                          |
| rs9424977                       | BMI    |                          |
| rs1047440                       | Weight |                          |
| rs1077393                       | Weight |                          |
| rs10835211                      | Weight |                          |
| rs1350341                       | Weight |                          |
| rs1350341                       | Weight |                          |
| rs17069257                      | Weight |                          |
| rs1973993                       | Weight |                          |
| rs2115172                       | Weight |                          |
| rs2260000                       | Weight |                          |
| rs2260000                       | Weight |                          |
| rs2844479                       | Weight |                          |
| rs2844479                       | Weight |                          |
| rs3766431                       | Weight |                          |
| rs633265                        | Weight |                          |
| rs6477693                       | Weight |                          |

| Supplementary Table 2 Continued |         |                    |
|---------------------------------|---------|--------------------|
| Risk SNP                        | Trait   | Publication        |
| rs10769908                      | BMI     |                    |
| rs10769908                      | BMI     |                    |
| rs10838738                      | BMI     |                    |
| rs10838738                      | BMI     |                    |
| rs10938397                      | BMI     |                    |
| rs10938397                      | BMI     |                    |
| rs11084753                      | BMI     |                    |
| rs11773921                      | BMI     |                    |
| rs12324805                      | BMI     |                    |
| rs1421085                       | BMI     |                    |
| rs1439845                       | BMI     |                    |
| rs17700144                      | BMI     |                    |
| rs17782313                      | BMI     |                    |
| rs17782313                      | BMI     |                    |
| rs2145270                       | BMI     |                    |
| rs2145270                       | BMI     | Willer et al. 2009 |
| rs2245715                       | BMI     |                    |
| rs2815752                       | BMI     |                    |
| rs2815752                       | BMI     |                    |
| rs2815752                       | BMI     |                    |
| rs4752856                       | BMI     |                    |
| rs6548238                       | BMI     |                    |
| rs6548238                       | BMI     |                    |
| rs6548238                       | BMI     |                    |
| rs6907460                       | BMI     |                    |
| rs7181095                       | BMI     |                    |
| rs7498665                       | BMI     |                    |
| rs7498665                       | BMI     |                    |
| rs752238                        | BMI     |                    |
| rs9931989                       | BMI     |                    |
| rs9939609                       | BMI     |                    |
| rs9939609                       | BMI     |                    |
| rs10508503                      | Obesity |                    |
| rs11071927                      | Obesity |                    |
| rs11956401                      | Obesity |                    |
| rs12588659                      | Obesity |                    |
| rs12633433                      | Obesity |                    |
| rs1326986                       | Obesity |                    |
| rs1343772                       | Obesity |                    |
| rs1380100                       | Obesity |                    |
| rs1396618                       | Obesity |                    |
| rs1421085                       | Obesity |                    |
| rs1424233                       | Obesity |                    |
| rs16829231                      | Obesity |                    |
| rs17782313                      | Obesity |                    |
| rs1805081                       | Obesity |                    |
| rs1858367                       | Obesity |                    |
| rs2011946                       | Obesity |                    |
| rs2158044                       | Obesity |                    |
| rs2908338                       | Obesity |                    |
| rs3026762                       | Obesity |                    |
| rs3102841                       | Obesity |                    |
| rs413693                        | Obesity |                    |
| rs4712652                       | Obesity |                    |
| rs4786847                       | Obesity |                    |
| rs6463923                       | Obesity |                    |
| rs646839                        | Obesity |                    |
| rs6580742                       | Obesity |                    |
| rs6796959                       | Obesity |                    |
| rs7506051                       | Obesity |                    |
| rs7717673                       | Obesity |                    |
| rs908078                        | Obesity |                    |
| rs9275582                       | Obesity |                    |
| rs987052                        | Obesity |                    |
|                                 |         | Meyere et al. 2009 |

| Supplementary Table 2 Continued |                     |                         |
|---------------------------------|---------------------|-------------------------|
| Risk SNP                        | Trait               | Publication             |
| rs10433903                      | Extreme Obesity     |                         |
| rs10999409                      | Extreme Obesity     |                         |
| rs12295638                      | Extreme Obesity     |                         |
| rs12492816                      | Extreme Obesity     |                         |
| rs12635698                      | Extreme Obesity     |                         |
| rs1435703                       | Extreme Obesity     |                         |
| rs2274459                       | Extreme Obesity     |                         |
| rs374748                        | Extreme Obesity     | Cotsapas et al. 2009    |
| rs6110577                       | Extreme Obesity     |                         |
| rs6726292                       | Extreme Obesity     |                         |
| rs7474896                       | Extreme Obesity     |                         |
| rs7603514                       | Extreme Obesity     |                         |
| rs9366829                       | Extreme Obesity     |                         |
| rs9941349                       | Extreme Obesity     |                         |
| rs999943                        | Extreme Obesity     |                         |
| rs10085177                      | Waist Circumference |                         |
| rs11970116                      | Waist Circumference |                         |
| rs13116494                      | Waist Circumference |                         |
| rs2245667                       | Waist Circumference |                         |
| rs4737325                       | Waist Circumference |                         |
| rs6429082                       | Waist Circumference | Lindgren et al. 2009    |
| rs7194591                       | Waist Circumference |                         |
| rs7826222                       | Waist Circumference |                         |
| rs7970350                       | Waist Circumference |                         |
| rs987237                        | Waist Circumference |                         |
| rs10096750                      | BMI                 |                         |
| rs10145154                      | BMI                 |                         |
| rs10146997                      | BMI                 |                         |
| rs10150332                      | BMI                 |                         |
| rs10173167                      | BMI                 |                         |
| rs10188334                      | BMI                 |                         |
| rs10189761                      | BMI                 |                         |
| rs10190052                      | BMI                 |                         |
| rs10193244                      | BMI                 |                         |
| rs10511835                      | BMI                 |                         |
| rs10813208                      | BMI                 |                         |
| rs10852521                      | BMI                 |                         |
| rs10871777                      | BMI                 |                         |
| rs10875982                      | BMI                 |                         |
| rs10969478                      | BMI                 |                         |
| rs11075985                      | BMI                 |                         |
| rs11075987                      | BMI                 |                         |
| rs11075989                      | BMI                 |                         |
| rs11075990                      | BMI                 |                         |
| rs11127483                      | BMI                 |                         |
| rs11127484                      | BMI                 |                         |
| rs11127485                      | BMI                 |                         |
| rs11127491                      | BMI                 |                         |
| rs11152213                      | BMI                 |                         |
| rs11169176                      | BMI                 |                         |
| rs1121980                       | BMI                 |                         |
| rs11520442                      | BMI                 |                         |
| rs11642841                      | BMI                 |                         |
| rs11660783                      | BMI                 |                         |
| rs11662368                      | BMI                 |                         |
| rs11663816                      | BMI                 |                         |
| rs11664883                      | BMI                 |                         |
| rs11665563                      | BMI                 |                         |
| rs12002080                      | BMI                 |                         |
| rs12149832                      | BMI                 |                         |
| rs12446228                      | BMI                 |                         |
| rs12623218                      | BMI                 |                         |
| rs12714414                      | BMI                 |                         |
| rs12714415                      | BMI                 |                         |
| rs12954782                      | BMI                 |                         |
| rs12955983                      | BMI                 |                         |
| rs12957347                      | BMI                 |                         |
| rs12960928                      | BMI                 |                         |
| rs12964203                      | BMI                 |                         |
|                                 |                     | Heard-Costa et al. 2009 |



| Supplementary Table 2 Continued |       |                            |
|---------------------------------|-------|----------------------------|
| Risk SNP                        | Trait | Publication                |
| rs12966550                      | BMI   |                            |
| rs12967135                      | BMI   |                            |
| rs12969709                      | BMI   |                            |
| rs12970134                      | BMI   |                            |
| rs12992154                      | BMI   |                            |
| rs12995480                      | BMI   |                            |
| rs13007080                      | BMI   |                            |
| rs13007086                      | BMI   |                            |
| rs13012571                      | BMI   |                            |
| rs13021737                      | BMI   |                            |
| rs1320330                       | BMI   |                            |
| rs1320331                       | BMI   |                            |
| rs1320336                       | BMI   |                            |
| rs1320337                       | BMI   |                            |
| rs1320338                       | BMI   |                            |
| rs13386517                      | BMI   |                            |
| rs13386627                      | BMI   |                            |
| rs13386964                      | BMI   |                            |
| rs13388043                      | BMI   |                            |
| rs13393304                      | BMI   |                            |
| rs13396935                      | BMI   |                            |
| rs13397165                      | BMI   |                            |
| rs13401686                      | BMI   |                            |
| rs13415094                      | BMI   |                            |
| rs1350341                       | BMI   |                            |
| rs1421085                       | BMI   |                            |
| rs1456404                       | BMI   |                            |
| rs1457489                       | BMI   |                            |
| rs1477196                       | BMI   |                            |
| rs1539952                       | BMI   |                            |
| rs1553754                       | BMI   |                            |
| rs1555967                       | BMI   |                            |
| rs1558902                       | BMI   |                            |
| rs1619975                       | BMI   |                            |
| rs1673518                       | BMI   | Heard-Costa et al.<br>2009 |
| rs17109256                      | BMI   |                            |
| rs17175643                      | BMI   |                            |
| rs17201502                      | BMI   |                            |
| rs17299673                      | BMI   |                            |
| rs17700144                      | BMI   |                            |
| rs17782313                      | BMI   |                            |
| rs17817288                      | BMI   |                            |
| rs17817449                      | BMI   |                            |
| rs17817964                      | BMI   |                            |
| rs1861866                       | BMI   |                            |
| rs1861867                       | BMI   |                            |
| rs1942860                       | BMI   |                            |
| rs1942863                       | BMI   |                            |
| rs1942866                       | BMI   |                            |
| rs2051311                       | BMI   |                            |
| rs2051312                       | BMI   |                            |
| rs2058908                       | BMI   |                            |
| rs2168708                       | BMI   |                            |
| rs2168711                       | BMI   |                            |
| rs2206277                       | BMI   |                            |
| rs2288278                       | BMI   |                            |
| rs2331841                       | BMI   |                            |
| rs2397026                       | BMI   |                            |
| rs2860323                       | BMI   |                            |
| rs2867108                       | BMI   |                            |
| rs2867109                       | BMI   |                            |
| rs2867110                       | BMI   |                            |
| rs2867112                       | BMI   |                            |
| rs2867113                       | BMI   |                            |
| rs2867122                       | BMI   |                            |
| rs2867123                       | BMI   |                            |
| rs2867125                       | BMI   |                            |
| rs2867131                       | BMI   |                            |
| rs2903492                       | BMI   |                            |

| Supplementary Table 2 Continued |       |                            |
|---------------------------------|-------|----------------------------|
| Risk SNP                        | Trait | Publication                |
| rs2947411                       | BMI   |                            |
| rs297924                        | BMI   |                            |
| rs34341                         | BMI   |                            |
| rs3751812                       | BMI   |                            |
| rs3751813                       | BMI   |                            |
| rs3928247                       | BMI   |                            |
| rs4045166                       | BMI   |                            |
| rs4299252                       | BMI   |                            |
| rs4423631                       | BMI   |                            |
| rs4438957                       | BMI   |                            |
| rs4452188                       | BMI   |                            |
| rs4613321                       | BMI   |                            |
| rs4615388                       | BMI   |                            |
| rs4620360                       | BMI   |                            |
| rs474112                        | BMI   |                            |
| rs475134                        | BMI   |                            |
| rs476828                        | BMI   |                            |
| rs4783819                       | BMI   |                            |
| rs4784323                       | BMI   |                            |
| rs4793927                       | BMI   |                            |
| rs4854344                       | BMI   |                            |
| rs4854348                       | BMI   |                            |
| rs4854349                       | BMI   |                            |
| rs487720                        | BMI   |                            |
| rs489693                        | BMI   |                            |
| rs492443                        | BMI   |                            |
| rs497353                        | BMI   |                            |
| rs5017300                       | BMI   |                            |
| rs5017303                       | BMI   |                            |
| rs521663                        | BMI   |                            |
| rs523288                        | BMI   |                            |
| rs536783                        | BMI   |                            |
| rs538656                        | BMI   |                            |
| rs545708                        | BMI   | Heard-Costa et al.<br>2009 |
| rs559623                        | BMI   |                            |
| rs562622                        | BMI   |                            |
| rs563726                        | BMI   |                            |
| rs565239                        | BMI   |                            |
| rs565970                        | BMI   |                            |
| rs571312                        | BMI   |                            |
| rs574988                        | BMI   |                            |
| rs589850                        | BMI   |                            |
| rs590215                        | BMI   |                            |
| rs591166                        | BMI   |                            |
| rs611428                        | BMI   |                            |
| rs633265                        | BMI   |                            |
| rs649721                        | BMI   |                            |
| rs6499640                       | BMI   |                            |
| rs6548237                       | BMI   |                            |
| rs6567155                       | BMI   |                            |
| rs6567160                       | BMI   |                            |
| rs6567161                       | BMI   |                            |
| rs663129                        | BMI   |                            |
| rs666181                        | BMI   |                            |
| rs6711012                       | BMI   |                            |
| rs6719518                       | BMI   |                            |
| rs6719980                       | BMI   |                            |
| rs6725549                       | BMI   |                            |
| rs6728726                       | BMI   |                            |
| rs6731348                       | BMI   |                            |
| rs6731688                       | BMI   |                            |
| rs6732471                       | BMI   |                            |
| rs6734363                       | BMI   |                            |
| rs6742576                       | BMI   |                            |
| rs6743060                       | BMI   |                            |
| rs6744646                       | BMI   |                            |
| rs6744653                       | BMI   |                            |
| rs6745266                       | BMI   |                            |
| rs6752470                       | BMI   |                            |

| Supplementary Table 2 Continued |       |                            |
|---------------------------------|-------|----------------------------|
| Risk SNP                        | Trait | Publication                |
| rs6755502                       | BMI   |                            |
| rs681630                        | BMI   |                            |
| rs682614                        | BMI   |                            |
| rs683430                        | BMI   |                            |
| rs7022642                       | BMI   |                            |
| rs7132908                       | BMI   |                            |
| rs7138803                       | BMI   |                            |
| rs7144011                       | BMI   |                            |
| rs7185735                       | BMI   |                            |
| rs7190492                       | BMI   |                            |
| rs7193144                       | BMI   |                            |
| rs7201850                       | BMI   |                            |
| rs7202116                       | BMI   |                            |
| rs7203521                       | BMI   |                            |
| rs7205986                       | BMI   |                            |
| rs7206010                       | BMI   |                            |
| rs7206790                       | BMI   |                            |
| rs7240566                       | BMI   |                            |
| rs7338657                       | BMI   |                            |
| rs7561317                       | BMI   |                            |
| rs7567570                       | BMI   |                            |
| rs7570198                       | BMI   |                            |
| rs7571957                       | BMI   |                            |
| rs7574359                       | BMI   |                            |
| rs7576624                       | BMI   |                            |
| rs7576635                       | BMI   |                            |
| rs7585056                       | BMI   |                            |
| rs7587786                       | BMI   |                            |
| rs7604609                       | BMI   |                            |
| rs7608050                       | BMI   |                            |
| rs7715806                       | BMI   |                            |
| rs7831920                       | BMI   |                            |
| rs8043757                       | BMI   | Heard-Costa et al.<br>2009 |
| rs8044769                       | BMI   |                            |
| rs8047395                       | BMI   |                            |
| rs8050136                       | BMI   |                            |
| rs8051591                       | BMI   |                            |
| rs8055197                       | BMI   |                            |
| rs8057044                       | BMI   |                            |
| rs8083289                       | BMI   |                            |
| rs8086627                       | BMI   |                            |
| rs8089364                       | BMI   |                            |
| rs8091524                       | BMI   |                            |
| rs8095404                       | BMI   |                            |
| rs921971                        | BMI   |                            |
| rs939582                        | BMI   |                            |
| rs939583                        | BMI   |                            |
| rs953442                        | BMI   |                            |
| rs975918                        | BMI   |                            |
| rs981106                        | BMI   |                            |
| rs981113                        | BMI   |                            |
| rs987237                        | BMI   |                            |
| rs9922047                       | BMI   |                            |
| rs9922619                       | BMI   |                            |
| rs9922708                       | BMI   |                            |
| rs9923147                       | BMI   |                            |
| rs9923233                       | BMI   |                            |
| rs9923544                       | BMI   |                            |
| rs9928094                       | BMI   |                            |
| rs9930333                       | BMI   |                            |
| rs9930501                       | BMI   |                            |
| rs9930506                       | BMI   |                            |
| rs9931494                       | BMI   |                            |
| rs9932754                       | BMI   |                            |
| rs9935401                       | BMI   |                            |
| rs9936385                       | BMI   |                            |
| rs9937053                       | BMI   |                            |

| Supplementary Table 2 Continued |                     |                            |
|---------------------------------|---------------------|----------------------------|
| Risk SNP                        | Trait               | Publication                |
| rs993887                        | BMI                 |                            |
| rs9939609                       | BMI                 |                            |
| rs9939973                       | BMI                 |                            |
| rs9940128                       | BMI                 |                            |
| rs9940646                       | BMI                 |                            |
| rs9941349                       | BMI                 |                            |
| rs10059683                      | Waist Circumference |                            |
| rs10066756                      | Waist Circumference |                            |
| rs10068332                      | Waist Circumference |                            |
| rs10146690                      | Waist Circumference |                            |
| rs10150482                      | Waist Circumference |                            |
| rs10869557                      | Waist Circumference |                            |
| rs10869558                      | Waist Circumference |                            |
| rs10869559                      | Waist Circumference |                            |
| rs11778132                      | Waist Circumference |                            |
| rs11780082                      | Waist Circumference |                            |
| rs11857639                      | Waist Circumference |                            |
| rs11990688                      | Waist Circumference |                            |
| rs12271537                      | Waist Circumference |                            |
| rs12274672                      | Waist Circumference |                            |
| rs12475139                      | Waist Circumference |                            |
| rs12792768                      | Waist Circumference |                            |
| rs13404551                      | Waist Circumference |                            |
| rs1447905                       | Waist Circumference |                            |
| rs1521252                       | Waist Circumference |                            |
| rs16930931                      | Waist Circumference |                            |
| rs17008958                      | Waist Circumference |                            |
| rs17061143                      | Waist Circumference |                            |
| rs17109221                      | Waist Circumference |                            |
| rs17476669                      | Waist Circumference |                            |
| rs17537900                      | Waist Circumference |                            |
| rs17836088                      | Waist Circumference |                            |
| rs2164210                       | Waist Circumference |                            |
| rs2236783                       | Waist Circumference |                            |
| rs2322659                       | Waist Circumference | Heard-Costa et al.<br>2009 |
| rs2322660                       | Waist Circumference |                            |
| rs2365642                       | Waist Circumference |                            |
| rs2370982                       | Waist Circumference |                            |
| rs303211                        | Waist Circumference |                            |
| rs309134                        | Waist Circumference |                            |
| rs309137                        | Waist Circumference |                            |
| rs309160                        | Waist Circumference |                            |
| rs309168                        | Waist Circumference |                            |
| rs4098360                       | Waist Circumference |                            |
| rs4420638                       | Waist Circumference |                            |
| rs4701252                       | Waist Circumference |                            |
| rs4758213                       | Waist Circumference |                            |
| rs4758215                       | Waist Circumference |                            |
| rs507824                        | Waist Circumference |                            |
| rs569406                        | Waist Circumference |                            |
| rs6499641                       | Waist Circumference |                            |
| rs6714750                       | Waist Circumference |                            |
| rs6716536                       | Waist Circumference |                            |
| rs6754311                       | Waist Circumference |                            |
| rs6817633                       | Waist Circumference |                            |
| rs6837818                       | Waist Circumference |                            |
| rs6870971                       | Waist Circumference |                            |
| rs687670                        | Waist Circumference |                            |
| rs693895                        | Waist Circumference |                            |
| rs6998794                       | Waist Circumference |                            |
| rs7110070                       | Waist Circumference |                            |
| rs7156625                       | Waist Circumference |                            |
| rs745500                        | Waist Circumference |                            |
| rs748841                        | Waist Circumference |                            |
| rs7579771                       | Waist Circumference |                            |
| rs7824886                       | Waist Circumference |                            |
| rs7932813                       | Waist Circumference |                            |
| rs8059991                       | Waist Circumference |                            |
| rs892715                        | Waist Circumference |                            |
| rs9598518                       | Waist Circumference |                            |
| rs9790104                       | Waist Circumference |                            |

| Supplementary Table 2 Continued |         |                       |
|---------------------------------|---------|-----------------------|
| Risk SNP                        | Trait   | Publication           |
| rs1024889                       | BMI     |                       |
| rs1152846                       | BMI     |                       |
| rs12517906                      | BMI     |                       |
| rs1458095                       | BMI     |                       |
| rs1878047                       | BMI     |                       |
| rs1927702                       | BMI     |                       |
| rs2383393                       | BMI     |                       |
| rs3803915                       | BMI     |                       |
| rs3803915                       | BMI     |                       |
| rs3934834                       | BMI     |                       |
| rs4085400                       | BMI     |                       |
| rs824931                        | BMI     |                       |
| rs875283                        | BMI     |                       |
| rs10844154                      | Weight  | Johansson et al. 2009 |
| rs10972341                      | Weight  |                       |
| rs10972350                      | Weight  |                       |
| rs1152846                       | Weight  |                       |
| rs12517906                      | Weight  |                       |
| rs1570885                       | Weight  |                       |
| rs1816002                       | Weight  |                       |
| rs1840440                       | Weight  |                       |
| rs2765086                       | Weight  |                       |
| rs4879869                       | Weight  |                       |
| rs7209395                       | Weight  |                       |
| rs7919006                       | Weight  |                       |
| rs965178                        | Weight  |                       |
| rs2275215                       | BMI     |                       |
| rs10458787                      | BMI     | Liu et al. 2010       |
| rs11127485                      | BMI     |                       |
| rs1558902                       | BMI     |                       |
| rs9935401                       | BMI     |                       |
| rs10926984                      | Obesity |                       |
| rs12145833                      | Obesity |                       |
| rs2783963                       | Obesity |                       |
| rs11127485                      | Obesity | Scherag et al. 2010   |
| rs17150703                      | Obesity |                       |
| rs13278851                      | Obesity |                       |
| rs516175                        | Obesity |                       |
| rs1558902                       | Obesity |                       |
| rs9935401                       | Obesity |                       |
| rs17700144**                    | Obesity |                       |

| Supplementary Table 2 Continued |       |                       |
|---------------------------------|-------|-----------------------|
| Risk SNP                        | Trait | Publication           |
| rs1558902                       | BMI   |                       |
| rs2860323                       | BMI   |                       |
| rs6567160                       | BMI   |                       |
| rs10938397                      | BMI   |                       |
| rs10767664                      | BMI   |                       |
| rs543874                        | BMI   |                       |
| rs2815752                       | BMI   |                       |
| rs10182181                      | BMI   |                       |
| rs12444979                      | BMI   |                       |
| rs7498665                       | BMI   |                       |
| rs987237                        | BMI   |                       |
| rs2241423                       | BMI   |                       |
| rs9816226                       | BMI   |                       |
| rs7138803                       | BMI   |                       |
| rs2287019                       | BMI   |                       |
| rs1514177                       | BMI   |                       |
| rs13107325                      | BMI   |                       |
| rs2112347                       | BMI   |                       |
| rs10968576                      | BMI   |                       |
| rs3817334                       | BMI   |                       |
| rs3810291                       | BMI   |                       |
| rs887912                        | BMI   | Speliotes et al. 2010 |
| rs10150332                      | BMI   |                       |
| rs7640855                       | BMI   |                       |
| rs11847697                      | BMI   |                       |
| rs2890652                       | BMI   |                       |
| rs11165643                      | BMI   |                       |
| rs4771122                       | BMI   |                       |
| rs4836133                       | BMI   |                       |
| rs4929949                       | BMI   |                       |
| rs29938                         | BMI   |                       |
| rs9296115                       | BMI   |                       |
| rs2922763                       | BMI   |                       |
| rs2444217                       | BMI   |                       |
| rs867559                        | BMI   |                       |
| rs3764400                       | BMI   |                       |
| rs255414                        | BMI   |                       |
| rs6955651                       | BMI   |                       |
| rs17016663                      | BMI   |                       |
| rs6477694                       | BMI   |                       |
| rs2652594                       | BMI   |                       |
| rs2035935                       | BMI   |                       |

**Supplementary Table 2 Footnote:** \*Reported as "SNP\_A-2284869" and crosswalked to rs ID using the Affy 6.0 SNP name to rs ID crosswalk file "GenomeWideSNP\_6.na30.annot.csv"; \*\*The GWAS catalog reports rs10871777 (in LD with rs17700144 at  $R^2=0.85$ ) as the obesity-associated SNP near the gene MC4R in Scherag et al. SNPs are reported only once per GWAS. Associations are reported for BMI where present and for other phenotypes where BMI was not investigated or the SNP was not associated with BMI at  $p < 1 \times 10^{-5}$

**Supplementary Table 3. Replicated and/or Genome-Wide Significant LD Blocks Identified in 3-Stage Approach Analyses.** LD blocks were defined from LD analyses of risk SNPs (genotype-phenotype association at  $p < 1 \times 10^{-5}$ ) using data from the HapMap version 3 CEU sample accessed via Seattle SNPs's Genome Variation Server and an LD threshold of  $R^2 \geq 0.95$ . Replication was evaluated as the number of GWAS reporting any SNP in the block as a risk SNP. Genes were evaluated within 100kb in either direction from an LD block's outermost SNPs.

| Chromosome | Identified LD Blocks | Replicated LD Blocks | Mean Number of Replications (All Blocks) | Genes                                |
|------------|----------------------|----------------------|------------------------------------------|--------------------------------------|
| 1          | 4                    | 3                    | 2.0                                      | <i>NEGR1, TNNI3K, PTB2, SEC16B</i>   |
| 2          | 6                    | 2                    | 2.0                                      | <i>LRP1B, TMEM18</i>                 |
| 3          | 3                    | 0                    | 1.0                                      | <i>CADM2, ETV5/DGKG</i>              |
| 4          | 2                    | 1                    | 1.5                                      | <i>GNPDA2, SLC39A8</i>               |
| 5          | 2                    | 0                    | 1.0                                      | <i>POC5, ZNF608</i>                  |
| 6          | 1                    | 1                    | 3.0                                      | <i>TFAP2B</i>                        |
| 9          | 2                    | 1                    | 1.5                                      | <i>LINGO2/LRRN6C, LMX1B</i>          |
| 11         | 7                    | 0                    | 1.0                                      | <i>RPL27A, BDNF, MTCH2</i>           |
| 12         | 1                    | 1                    | 3.0                                      | <i>BDCDIN3D/FAIM2/NCKAP5L</i>        |
| 13         | 1                    | 0                    | 3.0                                      | <i>MTIF3, GRF3A</i>                  |
| 14         | 2                    | 1                    | 1.5                                      | <i>PRKD1, NRXN3</i>                  |
| 15         | 1                    | 0                    | 1.0                                      | <i>MAP2K5</i>                        |
| 16         | 26                   | 14                   | 3.0                                      | <i>GRP5B, ATXN2L/TUFM/SH2B1, FTO</i> |
| 18         | 7                    | 7                    | 2.6                                      | <i>MC4R</i>                          |
| 19         | 4                    | 1                    | 1.3                                      | <i>KCTD15, ZC3H4, QPCTL, TMEM160</i> |

## Supplementary Table 4. Characteristics of Replicated and/or Genome-Wide Significant LD Blocks

| Chromosome | LD Block                                                                   |                          |                                                                                                                                                   | GWAS Publication                         |     |     |     |     |     |     |     |     |     |      |      |      |      |      |      |      |
|------------|----------------------------------------------------------------------------|--------------------------|---------------------------------------------------------------------------------------------------------------------------------------------------|------------------------------------------|-----|-----|-----|-----|-----|-----|-----|-----|-----|------|------|------|------|------|------|------|
|            | Chromosomal Space Covered by All Risk SNPs in the LD Block (NCBI Build 36) | Nearby Genes             | Seed SNPs (risk SNPs in LD with all risk SNPs in block at $R^2 \geq 0.95$ ) // Proxy SNPs (risk SNPs in LD with any seed SNP at $R^2 \geq 0.95$ ) | Any SNP in Block Genome-Wide Significant | [1] | [2] | [3] | [4] | [5] | [6] | [7] | [8] | [9] | [10] | [11] | [12] | [13] | [14] | [15] | [16] |
| 1          | 72,523,773 - 72,585,028                                                    | NEGR1                    | rs2568958, rs2815752, rs3101336                                                                                                                   | Yes                                      |     |     |     |     |     |     | X   | X   |     |      |      |      |      |      |      | X    |
|            | 74,763,990                                                                 | TNNI3K                   | rs1514177                                                                                                                                         | Yes                                      |     |     |     |     |     |     |     |     |     |      |      |      |      |      |      | X    |
|            | 96,696,685 - 96,716,582                                                    | PTBP2                    | rs11165643 // rs1973993                                                                                                                           | Yes                                      |     |     |     |     |     |     | X   |     |     |      |      |      |      |      |      | X    |
|            | 176,156,103 - 176,180,142                                                  | SEC16B                   | rs10913469, rs543874                                                                                                                              | Yes                                      |     |     |     |     |     |     | X   |     |     |      |      |      |      |      |      | X    |
| 2          | 604,168 - 643,874                                                          | TMEM18                   | See footnote                                                                                                                                      | Yes                                      |     |     |     |     |     |     | X   |     |     |      | X    |      |      | X    | X    |      |
|            | 604,210 - 643,874                                                          | TMEM18                   |                                                                                                                                                   | Yes                                      |     |     |     |     |     | X   |     |     |     |      | X    |      |      | X    | X    |      |
|            | 624,905                                                                    | TMEM18                   | rs6548238                                                                                                                                         | Yes                                      |     |     |     |     |     |     | X   |     |     |      |      |      |      |      |      |      |
|            | 25,003,800                                                                 |                          | rs10182181                                                                                                                                        | Yes                                      |     |     |     |     |     |     |     |     |     |      |      |      |      |      | X    |      |
|            | 59,156,381                                                                 |                          | rs887912                                                                                                                                          | Yes                                      |     |     |     |     |     |     |     |     |     |      |      |      |      |      | X    |      |
|            | 142,676,401                                                                | LRP1B                    | rs2890652                                                                                                                                         | Yes                                      |     |     |     |     |     |     |     |     |     |      |      |      |      |      | X    |      |
| 3          | 85,956,854                                                                 | CADM2                    | rs7640855                                                                                                                                         | Yes                                      |     |     |     |     |     |     |     |     |     |      |      |      |      |      | X    |      |
|            | 187,316,984                                                                | ETV5/DGKG                | rs7647305                                                                                                                                         | Yes                                      |     |     |     |     |     |     | X   |     |     |      |      |      |      |      |      |      |
|            | 187,317,193                                                                | ETV5/DGKG                | rs9816226                                                                                                                                         | Yes                                      |     |     |     |     |     |     |     |     |     |      |      |      |      |      | X    |      |
| 4          | 44,877,284                                                                 |                          | rs10938397                                                                                                                                        | Yes                                      |     |     |     |     |     |     |     | X   |     |      |      |      |      |      | X    |      |
|            | 103,407,732                                                                | SLC39A8                  | rs13107325                                                                                                                                        | Yes                                      |     |     |     |     |     |     |     |     |     |      |      |      |      |      | X    |      |
| 5          | 75,050,998                                                                 | POC5                     | rs2112347                                                                                                                                         | Yes                                      |     |     |     |     |     |     |     |     |     |      |      |      |      |      | X    |      |
|            | 124,360,002                                                                |                          | rs4836133                                                                                                                                         | Yes                                      |     |     |     |     |     |     |     |     |     |      |      |      |      |      | X    |      |
| 6          | 50,906,485 - 50,911,009                                                    | TFAP2B                   | rs2206277, rs987237                                                                                                                               | Yes                                      |     |     |     |     |     |     |     |     |     |      | X    | X    |      |      | X    |      |
| 9          | 28,404,339                                                                 | LINGO2                   | rs10968576                                                                                                                                        | Yes                                      |     |     |     |     |     |     |     |     |     |      |      |      |      |      | X    |      |
|            | 128,505,146                                                                | LMX1B                    | rs867559                                                                                                                                          | $p < 1 \times 10^{-6}$                   |     |     |     |     |     |     | X   |     |     |      |      |      |      |      | X    |      |
| 11         | 8,561,169                                                                  | STK33                    | rs4929949                                                                                                                                         | Yes                                      |     |     |     |     |     |     |     |     |     |      |      |      |      |      | X    |      |
|            | 27,603,861 - 27,626,684                                                    | BDNF                     | rs10501087, rs4074134, rs4923461                                                                                                                  | Yes                                      |     |     |     |     |     |     | X   |     |     |      |      |      |      |      |      |      |
|            | 27,636,492                                                                 | BDNF                     | rs6265                                                                                                                                            | Yes                                      |     |     |     |     |     |     | X   |     |     |      |      |      |      |      |      |      |
|            | 27,682,562                                                                 | BDNF                     | rs10767664                                                                                                                                        | Yes                                      |     |     |     |     |     |     |     |     |     |      |      |      |      |      | X    |      |
|            | 27,623,778 - 27,623,778                                                    | BDNF                     | rs925946                                                                                                                                          | Yes                                      |     |     |     |     |     |     | X   |     |     |      |      |      |      |      |      |      |
|            | 47,604,618 - 47,619,625                                                    | MTCH2                    | rs10838738, rs4752856                                                                                                                             | Yes                                      |     |     |     |     |     |     |     | X   |     |      |      |      |      |      |      |      |
| 47,607,569 | MTCH2                                                                      | rs3817334                | Yes                                                                                                                                               |                                          |     |     |     |     |     |     |     |     |     |      |      |      |      | X    |      |      |
| 12         | 48,533,735                                                                 | BDCDIN3D, FAIM2, NCKAP5L | rs7138803                                                                                                                                         | Yes                                      |     |     |     |     |     |     | X   |     |     |      |      | X    |      |      | X    |      |
| 13         | 26,918,180                                                                 | MTIF3, GRF3A             | rs4771122                                                                                                                                         | Yes                                      |     |     |     |     |     |     |     |     |     |      |      |      |      |      | X    |      |
| 14         | 29,584,863                                                                 |                          | rs11847697                                                                                                                                        | Yes                                      |     |     |     |     |     |     |     |     |     |      |      |      |      |      | X    |      |
|            | 78,961,635 - 79,014,915                                                    | NRXN3                    | rs10145154, rs10150332, rs17109256, rs7144011 // rs10146997, rs10150482, rs17109221, rs17836088, rs7156625                                        | Yes                                      |     |     |     |     |     |     |     |     |     |      |      |      | X    |      | X    |      |
| 15         | 65,873,892                                                                 | MAP2K5                   | rs2241423                                                                                                                                         | Yes                                      |     |     |     |     |     |     |     |     |     |      |      |      |      |      | X    |      |



| Supplementary Table 4 Continued |                                                                            | LD Block                                 |                                                                                                                                                                                                                                                                                                           | GWAS Publication                         |     |     |     |     |     |     |     |     |     |      |      |      |      |      |      |      |
|---------------------------------|----------------------------------------------------------------------------|------------------------------------------|-----------------------------------------------------------------------------------------------------------------------------------------------------------------------------------------------------------------------------------------------------------------------------------------------------------|------------------------------------------|-----|-----|-----|-----|-----|-----|-----|-----|-----|------|------|------|------|------|------|------|
| Chromosome                      | Chromosomal Space Covered by All Risk SNPs in the LD Block (NCBI Build 36) | Genes Overlapping LD Block/ 10kb of SNP* | Seed SNPs (risk SNPs in LD with all risk SNPs in block at R <sup>2</sup> ≥0.95) // Proxy SNPs (risk SNPs in LD with any seed SNP at R <sup>2</sup> ≥0.95)                                                                                                                                                 | Any SNP in Block Genome-Wide Significant | [1] | [2] | [3] | [4] | [5] | [6] | [7] | [8] | [9] | [10] | [11] | [12] | [13] | [14] | [15] | [16] |
|                                 | 55,962,962                                                                 | <i>MC4R</i>                              | rs17700144                                                                                                                                                                                                                                                                                                | p<1x10 <sup>-6</sup>                     |     |     |     |     |     |     |     | X   |     |      |      | X    |      |      |      | X    |
|                                 | 55,980,115 - 56,003,928                                                    | <i>MC4R</i>                              | rs10871777, rs11152213, rs12967135, rs17782313, rs2168711, rs476828, rs523288, rs538656, rs571312, rs6567160, rs663129                                                                                                                                                                                    | Yes                                      |     |     |     |     |     | X   |     | X   | X   |      |      | X    |      |      |      | X    |
|                                 | 55,964,628 - 56,003,732                                                    | <i>MC4R</i>                              | rs1350341, rs1619975, rs1673518, rs2051311, rs2051312, rs2331841, rs474112, rs475134, rs487720, rs536783, rs545708, rs559623, rs562622, rs565239, rs565970, rs574988, rs589850, rs591166, rs611428, rs649721, rs6567161, rs666181, rs681630, rs682614, rs683430, rs975918, rs993887 // rs521663, rs633265 | p<1x10 <sup>-6</sup>                     |     |     |     |     |     |     |     | X   |     |      |      | X    |      |      |      |      |
| 18                              | 56,009,782 - 56,048,783                                                    | <i>MC4R</i>                              | rs12960928 // rs11663816, rs11664883, rs11665563, rs12954782, rs12969709, rs12970134, rs1457489, rs17175643, rs492443, rs8083289, rs8089364, rs921971                                                                                                                                                     | Yes                                      |     |     |     |     |     |     |     | X   |     |      |      | X    |      |      |      |      |
|                                 | 56,009,782 - 56,062,310                                                    | <i>MC4R</i>                              | rs921971 // rs11663816, rs11664883, rs11665563, rs12954782, rs12955983, rs12960928, rs12964203, rs12966550, rs12969709, rs12970134, rs1457489, rs17175643, rs2168708, rs492443, rs8083289, rs8089364                                                                                                      | Yes                                      |     |     |     |     |     |     |     | X   |     |      |      | X    |      |      |      |      |
|                                 | 56,009,809 - 56,047,722                                                    | <i>MC4R</i>                              | rs12955983 // rs11663816, rs11664883, rs11665563, rs12954782, rs12969709, rs12970134, rs1457489, rs17175643, rs8083289, rs8089364, rs921971                                                                                                                                                               | Yes                                      |     |     |     |     |     |     |     | X   |     |      |      | X    |      |      |      |      |
|                                 | 56,009,809 - 56,062,310                                                    | <i>MC4R</i>                              | rs11663816, rs11664883, rs11665563, rs12954782, rs12964203, rs12966550, rs12969709, rs12970134, rs1457489, rs17175643, rs2168708, rs8083289, rs8089364 // rs12955983, rs12960928, rs921971                                                                                                                | Yes                                      |     |     |     |     |     |     |     | X   |     |      |      | X    |      |      |      |      |
| 19                              | 39,001,372 - 39,003,321                                                    | <i>KCTD15</i>                            | rs29938, rs29941                                                                                                                                                                                                                                                                                          | Yes                                      |     |     |     |     |     |     |     | X   |     |      |      |      |      |      |      | X    |
|                                 | 39,013,977                                                                 | <i>KCTD15</i>                            | rs11084753                                                                                                                                                                                                                                                                                                | Yes                                      |     |     |     |     |     |     |     |     | X   |      |      |      |      |      |      |      |
|                                 | 52,260,843                                                                 | ZC3H4, TMEM160                           | rs3810291                                                                                                                                                                                                                                                                                                 | Yes                                      |     |     |     |     |     |     |     |     |     |      |      |      |      |      |      | X    |
|                                 | 50,894,012                                                                 | QPCTL                                    | rs2287019                                                                                                                                                                                                                                                                                                 | Yes                                      |     |     |     |     |     |     |     |     |     |      |      |      |      |      |      | X    |

Supplementary Table 4 Footnote: GWAS are numbered as follows: [1] Frayling et al. 2007, *Science*; [2] Scuteri et al. 2007, *PLoS Genetics*; [3] Fox et al. 2007, *BMC Medical Genetics*; [4] Hinney et al. 2007, *PLoS One*; [5] Liu et al. 2008, *Human Molecular Genetics*; [6] Loos et al. 2008, *Nature Genetics*; [7] Thorleifsson et al. 2009, *Nature Genetics*; [8] Willer et al. 2009, *Nature Genetics*; [9] Meyere et al. 2009 *Nature Genetics*; [10] Cotsapas et al. 2009, *Human Molecular Genetics*; [11] Lindgren et al. 2009 *PLoS Genetics*; [12] Heard-Costa et al. 2009, *PLoS Genetics*; [13] Johansson et al. 2009, *Obesity*; [14] Liu et al. 2010, *Twin Research and Human Genetics*; [15] Shcerag et al. 2010, *PLoS Genetics*; Speliotes et al. 2010, *Nature Genetics*. LD Blocks were defined using an R<sup>2</sup> threshold of 0.95. Genes are reported within 100 kb of any seed SNP. Italicized genes fall outside the 100kb range, but contain SNPs in LD with a block seed. GWAS are indicated as replicating a block if they reported a SNP in LD at R<sup>2</sup>≥0.95 with a block seed or proxy as associated with an obesity-related phenotype at p<1x10<sup>-5</sup> in either their discovery or combined discovery and replication samples.

Block 2.2: (seeds) rs10173167, rs10188334, rs10189761, rs10190052, rs10193244, rs11127484, rs11127485, rs11127491, rs12714414, rs12714415, rs12992154, rs12995480, rs13007080, rs13007086, rs13012571, rs13021737, rs1320331, rs1320336, rs1320337, rs1320338, rs13386517, rs13386627, rs13386964, rs13388043, rs13393304, rs13396935, rs13397165, rs13401686, rs13415094, rs2860323, rs2867108, rs2867109, rs2867110, rs2867112, rs2867113, rs2867122, rs2867125, rs2903492, rs2947411, rs4423631, rs4452188, rs4613321, rs4854344, rs4854348, rs4854349, rs5017300, rs5017303, rs6711012, rs6719518, rs6719980, rs6725549, rs6728726, rs6731348, rs6731688,

rs6732471, rs6734363, rs6743060, rs6744646, rs6744653, rs6752470, rs6755502, rs7561317, rs7567570, rs7570198, rs7571957, rs7574359, rs7576624, rs7576635, rs7585056, rs7604609, rs7608050, rs939582, rs939583

Block 2.3: (**seeds**) rs2867123, (**proxies**) rs10173167, rs10188334, rs10189761, rs10190052, rs10193244, rs11127484, rs11127485, rs11127491, rs12714414, rs12714415, rs12992154, rs12995480, rs13007080, rs13007086, rs13012571, rs13021737, rs1320331, rs1320336, rs1320337, rs1320338, rs13386517, rs13386627, rs13386964, rs13388043, rs13393304, rs13396935, rs13397165, rs13401686, rs13415094, rs2860323, rs2867108, rs2867109, rs2867110, rs2867112, rs2867113, rs2867122, rs2867123, rs2867125, rs2903492, rs4423631, rs4452188, rs4613321, rs4854344, rs4854348, rs4854349, rs5017300, rs5017303, rs6711012, rs6719518, rs6719980, rs6725549, rs6728726, rs6731348, rs6731688, rs6732471, rs6734363, rs6743060, rs6744646, rs6744653, rs6752470, rs6755502, rs7561317, rs7567570, rs7570198, rs7571957, rs7574359, rs7576624, rs7576635, rs7585056, rs7604609, rs7608050, rs939582, rs939583

In Press - Biodemography & Social Biology



**Supplementary Table 5. Effect Sizes for Genetic Risk Scores Created Using the 3-Stage Approach and the Best-Guess and Top-Hits Approaches.**

To measure BMI effect sizes for the GRSs, we estimated Pearson correlations ( $r$ ) from separate linear regressions of BMI on each of the GRSs. To measure obesity effect sizes for the GRSs, we estimated odds ratios (OR) from separate logistic regressions of obesity on each of the GRSs. Regression models were adjusted for age (linear and quadratic terms), gender, the age-gender interaction, and the ARIC Study Centers where data were collected. In Panel A, the Best-Guess GRS was based on the GRS published by Li and colleagues (Li et al. 2010) and the Top-Hits GRS was based on the GRS published by Peterson and colleagues (Peterson et al. 2011). In Panel B, the Best-Guess GRS was based on the full set of obesity- and BMI-associated SNPs listed in the NHGRI GWAS Catalog and the Top-Hits GRS was based on the GRS published by Speliotes and colleagues (Speliotes et al. 2010). \*\*\* $p < 0.001$ . Comparison of effect sizes using the seemingly unrelated regression method (Baltagi 1980) indicated that effect sizes for the 3 GRSs in Panel A were not statistically different from one another ( $p$ -value for difference  $> 0.10$  for all), but that among the GRSs in Panel B, the 3-stage approach performed better than the Best-Guess and Top-Hits GRSs ( $p < 0.05$  for all). However, our sample had only 40% power to detect effect size differences of  $r = 0.01$  /  $OR = 1.01$ , so this result should be interpreted with caution.

| Approach to GRS Construction                                                    | SNPs | Effect Sizes                          |                                   |
|---------------------------------------------------------------------------------|------|---------------------------------------|-----------------------------------|
|                                                                                 |      | BMI<br>Pearson Correlation<br>( $r$ ) | Obesity<br>Odds Ratio<br>[95% CI] |
| Panel A. GRSs Constructed from Results of 9 GWAS Published by December 31, 2008 |      |                                       |                                   |
| 3-Stage                                                                         | 28   | 0.08***                               | 1.08 [1.06-1.10]                  |
| Best-Guess                                                                      | 12   | 0.08***                               | 1.08 [1.06-1.11]                  |
| Top-Hits                                                                        | 59   | 0.06***                               | 1.07 [1.04-1.09]                  |
| Panel B. GRSs Constructed from Results of the Full Set of 16 GWAS               |      |                                       |                                   |
| 3-Stage                                                                         | 57   | 0.11***                               | 1.12 [1.10-1.15]                  |
| Best-Guess                                                                      | 97   | 0.10***                               | 1.11 [1.09-1.13]                  |
| Top-Hits                                                                        | 32   | 0.10***                               | 1.10 [1.08-1.12]                  |

**Supplementary Table 6. Analysis of Loci with Multiple Tag SNPs.** \* "Lead SNP" is underlined; "Worst-associated SNP" is italicized; Test statistics and effect sizes were estimated in linear regression models of BMI adjusted for demographics and geography. "Lead SNPs" and "Worst-associated SNPs" were determined from the test statistics for the individual SNPs. Effect sizes were compared using the seemingly unrelated regressions method (Baltagi 1980).

| Locus               | ARIC SNPs Tagging LD Blocks in Genic Region                                                                                                                                                                                        | Minimum R <sup>2</sup> Among Tag SNPs | Effect Size (Pearson's r) |                      |                                       |
|---------------------|------------------------------------------------------------------------------------------------------------------------------------------------------------------------------------------------------------------------------------|---------------------------------------|---------------------------|----------------------|---------------------------------------|
|                     |                                                                                                                                                                                                                                    |                                       | Lead SNP                  | Worst-Associated SNP | Mean Number of BMI-Increasing Alleles |
| Chr 2 <i>TMEM18</i> | <i>rs10189761</i> , <i>rs2867123</i> , <i>rs4854345</i>                                                                                                                                                                            | 0.94                                  | <u>0.027</u>              | 0.023<br>p=0.276     | 0.025<br>p=0.371                      |
| Chr 3 ETV5/DGKG     | <i>rs12516728</i> , <i>rs9863591</i>                                                                                                                                                                                               | 0.85                                  | 0.007                     | <0.001<br>p=0.721    | 0.018<br>p=0.427                      |
| Chr 11 BDNF         | <i>rs10501087</i> , <i>rs7103411</i> , <i>rs6265</i> , <i>rs11030108</i>                                                                                                                                                           | 0.86                                  | 0.027                     | 0.022<br>p=0.124     | 0.026<br>p=0.485                      |
| Chr 11 MTCH         | <i>rs12419692</i> , <i>rs3817334</i>                                                                                                                                                                                               | 0.77                                  | 0.020                     | 0.019<br>p=0.871     | 0.020<br>p=0.878                      |
| Chr 16 FTO          | <i>rs1477196</i> , <i>rs17817288</i> , <i>rs1121980</i> , <i>rs9922047</i> , <i>rs9939973</i> , <i>rs9940128</i> , <i>rs9941349</i> , <i>rs7193144</i> , <i>rs7203521</i> , <i>rs9939609</i> , <i>rs8050136</i> , <i>rs9930506</i> | 0.40                                  | <u>0.072</u>              | 0.034<br>p<0.001     | 0.068<br>p=0.104                      |
| Chr 18 MC4R         | <i>rs476828</i> , <i>rs1673518</i> , <i>rs17782313</i> , <i>rs11663816</i> , <i>rs11665563</i> , <i>rs12969709</i> , <i>rs12970134</i>                                                                                             | 0.25                                  | 0.026                     | 0.019<br>p=0.158     | 0.025<br>p=0.062                      |
| Chr 19 KCDT15       | <i>rs29942</i> , <i>rs11084753</i>                                                                                                                                                                                                 | 0.58                                  | 0.010                     | 0.009<br>p=0.879     | 0.009<br>p=0.913                      |

**Supplementary Table 7. SNPs Included in the Obesity Genetic Risk Score.**

| Chr | Nearby Gene         | Tag SNP    | GWAS Replications | BMI-Increasing Allele in GWAS | Test Allele | Other Allele | Effect-Size Weight | White Participants, n=8,210-8,8286 |                          |          | Black Participants, n=2,402-2,442               |                       |                          |         |                                                 |
|-----|---------------------|------------|-------------------|-------------------------------|-------------|--------------|--------------------|------------------------------------|--------------------------|----------|-------------------------------------------------|-----------------------|--------------------------|---------|-------------------------------------------------|
|     |                     |            |                   |                               |             |              |                    | Test Allele Frequency              | Per Allele Change in BMI | p-value  | Direction of Association Inconsistent with GWAS | Test Allele Frequency | Per Allele Change in BMI | p-value | Direction of Association Inconsistent with GWAS |
| 1   | NEGR1               | rs2815752  | 3                 | Major                         | G           | A            | 0.13               | 38%                                | -0.259                   | 0.001    |                                                 | 45%                   | -0.071                   | 0.673   |                                                 |
|     | TNNI3K              | rs1514175  | 1                 | Minor                         | A           | G            | 0.07               | 43%                                | -0.001                   | 0.985    |                                                 | 68%                   | -0.091                   | 0.608   | X                                               |
|     | PTBP2               | rs1555543  | 2                 | Major                         | A           | C            | 0.06               | 42%                                | -0.128                   | 0.086    |                                                 | 57%                   | -0.031                   | 0.855   |                                                 |
|     | SEC16B              | rs543874   | 2                 | Minor                         | G           | A            | 0.22               | 20%                                | 0.341                    | 0.000    |                                                 | 25%                   | 0.335                    | 0.095   |                                                 |
| 2   | FANCL               | rs759250   | 1                 | Minor                         | A           | G            | 0.10               | 29%                                | 0.036                    | 0.656    |                                                 | 8%                    | -0.242                   | 0.475   | X                                               |
|     | LRP1B               | rs2121279  | 1                 | Minor                         | T           | C            | 0.08               | 14%                                | 0.234                    | 0.032    |                                                 | 3%                    | -0.253                   | 0.651   | X                                               |
|     | TMEM18              | rs2867123  | 5                 | Major                         | G           | C            | 0.30               | 17%                                | -0.237                   | 0.018    |                                                 | 12%                   | 0.022                    | 0.935   | X                                               |
|     | RBJ                 | rs10182181 | 1                 | Minor                         | G           | A            | 0.14               | 46%                                | 0.117                    | 0.117    |                                                 | 84%                   | 0.758                    | 0.001   |                                                 |
| 3   | CADM2               | rs12714640 | 1                 | Minor                         | A           | C            | 0.10               | 19%                                | 0.278                    | 0.003    |                                                 | 6%                    | 0.006                    | 0.987   |                                                 |
|     | ETV5/DGKG           | rs1516728  | 2                 | Major                         | T           | A            | 0.11               | 23%                                | -0.060                   | 0.489    |                                                 | 52%                   | -0.098                   | 0.565   |                                                 |
| 4   | GNPDA2              | rs12641981 | 2                 | Minor                         | T           | C            | 0.18               | 43%                                | 0.088                    | 0.238    |                                                 | 23%                   | 0.103                    | 0.602   |                                                 |
|     | SLC39A8             | rs13114738 | 1                 | Minor                         | T           | C            | 0.13               | 8%                                 | 0.506                    | 4.15E-04 |                                                 | 1%                    | -1.583                   | 0.008   | X                                               |
| 5   | POC5 FLJ35779       | rs10057967 | 1                 | Major                         | C           | T            | 0.10               | 37%                                | -0.227                   | 0.003    |                                                 | 49%                   | 0.128                    | 0.435   | X                                               |
|     | ZNF608              | rs6864049  | 1                 | Minor                         | G           | A            | 0.07               | 46%                                | -0.189                   | 0.012    | X                                               | 19%                   | -0.463                   | 0.033   | X                                               |
| 6   | TFAP2B              | rs734597   | 3                 | Minor                         | A           | G            | 0.13               | 17%                                | 0.382                    | 1.21E-04 |                                                 | 9%                    | 0.030                    | 0.920   |                                                 |
| 9   | LINGO2 LRRN6C       | rs1412235  | 1                 | Minor                         | C           | G            | 0.11               | 31%                                | 0.003                    | 0.970    |                                                 | 16%                   | 0.365                    | 0.111   |                                                 |
|     | LMX1B               | rs867559   | 2                 | Minor                         | G           | A            | 0.24               | 20%                                | 0.088                    | 0.339    |                                                 | 32%                   | 0.025                    | 0.889   |                                                 |
| 11  | RPL27A              | rs2028882  | 1                 | Major                         | C           | A            | 0.06               | 50%                                | -0.065                   | 0.375    |                                                 | 66%                   | 0.116                    | 0.515   | X                                               |
|     | BDNF                | rs10501087 | 2                 | Major                         | C           | T            | 0.18               | 21%                                | -0.223                   | 0.013    |                                                 | 7%                    | -0.521                   | 0.181   |                                                 |
|     | MTCH2               | rs12419692 | 2                 | Minor                         | A           | C            | 0.05               | 36%                                | 0.146                    | 0.059    |                                                 | 9%                    | 0.012                    | 0.968   |                                                 |
| 12  | BDCDIN3D, FAIM2     | rs7138803  | 3                 | Minor                         | A           | G            | 0.12               | 38%                                | 0.164                    | 0.033    |                                                 | 17%                   | 0.100                    | 0.650   |                                                 |
| 13  | MTIF3, GRF3A        | rs1475219  | 1                 | Minor                         | C           | T            | 0.09               | 21%                                | 0.262                    | 0.004    |                                                 | 22%                   | -0.099                   | 0.632   | X                                               |
| 14  | PRKD1               | rs1440983  | 1                 | Minor                         | A           | G            | 0.15               | 5%                                 | 0.266                    | 0.129    |                                                 | 23%                   | 0.156                    | 0.449   |                                                 |
|     | NRXN3               | rs7144011  | 2                 | Minor                         | T           | G            | 0.13               | 22%                                | 0.165                    | 0.064    |                                                 | 24%                   | 0.164                    | 0.428   |                                                 |
| 15  | MAP2K5              | rs28670272 | 1                 | Major                         | G           | A            | 0.13               | 23%                                | -0.212                   | 0.014    |                                                 | 41%                   | 0.005                    | 0.977   | X                                               |
|     | GPR5B               | rs11639988 | 1                 | Major                         | G           | A            | 0.17               | 15%                                | 0.006                    | 0.952    | X                                               | 24%                   | -0.262                   | 0.194   |                                                 |
| 16  | ATXN2L, TUFM, SH2B1 | rs12443881 | 3                 | Minor                         | T           | C            | 0.15               | 39%                                | -0.005                   | 0.948    | X                                               | 9%                    | -0.607                   | 0.030   | X                                               |
|     | FTO                 | rs9939609  | 11                | Minor                         | A           | T            | 0.38               | 41%                                | 0.496                    | 8.19E-11 |                                                 | 48%                   | 0.129                    | 0.443   |                                                 |
| 18  | MC4R                | rs12970134 | 6                 | Minor                         | A           | G            | 0.21               | 26%                                | 0.209                    | 0.012    |                                                 | 13%                   | 0.057                    | 0.822   |                                                 |
| 19  | KCTD15              | rs11084753 | 3                 | Major                         | A           | G            | 0.04               | 33%                                | -0.071                   | 0.371    |                                                 | 36%                   | 0.197                    | 0.270   | X                                               |
|     | QPCTL               | rs11083779 | 1                 | Major                         | C           | T            | 0.07               | 4%                                 | -0.227                   | 0.196    |                                                 | 11%                   | -0.267                   | 0.294   |                                                 |
|     | ZC3H4 TMEM160       | rs7250850  | 1                 | Major                         | G           | C            | 0.09               | 29%                                | -0.174                   | 0.032    |                                                 | 80%                   | -0.343                   | 0.124   |                                                 |

Supplementary Table 7 Footnote: GWAS replications include GWAS reporting any SNP in any LD block tagged by the SNP as obesity-associated at  $p < 1 \times 10^{-5}$  in the discovery or combined discovery and replication samples. Test allele and other allele are reported from the positive strand. Effect-size weights were obtained from (Speliotes et al. 2010) for all SNPs with the exception of rs867559, for which the effect size weight was obtained from (Thorleifsson et al. 2009). Allele frequencies and per-allele effects are reported based on all participants in the analysis sample. Per-allele effects were estimated from linear regressions of BMI on SNP genotype (number of minor alleles), adjusted for demographics and geography. P-values are reported based on heteroskedasticity robust standard errors.

**Supplementary Table 8. Educational Attainment of White and African American ARIC Participants.**

Educational attainment was ascertained via self-report at the first ARIC visit. Distributions of BMI-increasing alleles for the 32 obesity GRS SNPs were comparable across educational strata in African Americans and whites ( $p > 0.10$  for all comparisons).

| <u>Highest Level of Schooling</u> | <u>Percent of Visit 1 Sample</u> |     |
|-----------------------------------|----------------------------------|-----|
| None/ Grade School                | 5%                               | 19% |
| Some High School                  | 11%                              | 21% |
| High School Graduate              | 36%                              | 22% |
| Vocational School                 | 9%                               | 7%  |
| College                           | 30%                              | 18% |
| Graduate/ Professional School     | 9%                               | 14% |

In Press - Biodemography & Social Biology

**Supplementary Table 9. Predictiveness of Model-Based Risk Scores With and Without The Obesity Genetic Risk Score.** (m1-5) denote separate models used to estimate risk scores for BMI and obesity. Risk scores were predicted values from linear regression of BMI and predicted probabilities from probit regressions of obesity. The first model, m1, includes measures of age, sex, and ARIC Study Center where data were collected. The regression model was specified to include linear and quadratic terms for age and a product term modeling interaction between age and sex. The simple genetic risk assessment (SNPs in *FTO* and downstream of *MC4R*) is a component of the weighted obesity genomic risk score. Thus, model m3 contains all of the information in model m2 as well as information from the remaining 30 SNPs included in the GRS. The 5 categories of socioeconomic status were modeled as dichotomous variables and were allowed to vary by sex in their relationship with obesity and BMI. Values of  $R^2$  were estimated using linear regression models adjusted for demographic and geographic information. Percentile-based confidence intervals were generated using the bootstrap method. AUCs and percentile-based confidence intervals were estimated from ROC curves constructed for predicted values generated using a probit regression model and were adjusted for the ARIC Study Center where data were collected using Pepe's method (Janes and Pepe 2009; Pepe, Longton, and Janes 2009). IDIs and test statistics were estimated only for comparisons of models m3 and m2 and models m5 and m4 using Pencina's Method (Pencina et al. 2008). IDIs for comparisons of models m2 and m3 with model m1 are identical to those reported for the respective obesity risk measures in Table 4 of the article.

| Model | Model Components                                           | White ARIC Participants (n=8,286) |                        |                     | Black ARIC Participants (n=2,442) |                         |                  |
|-------|------------------------------------------------------------|-----------------------------------|------------------------|---------------------|-----------------------------------|-------------------------|------------------|
|       |                                                            | $R^2$ (95% CI)                    | AUC (95% CI)           | IDI (p-value)       | $R^2$ (95% CI)                    | AUC (95% CI)            | IDI (p-value)    |
| (m1)  | Demographic & Geographic Information                       | 3.20%                             | 0.526                  |                     | 5.17%                             | 0.604                   |                  |
| (m2)  | m1 + Simple Genetic Risk Assessment                        | 3.88%                             | 0.550                  |                     | 5.35%                             | 0.607                   |                  |
| (m3)  | m1 + Weighted GRS                                          | 4.88%                             | 0.574                  |                     | 5.52%                             | 0.609                   |                  |
|       | Change in predictiveness with addition of the weighted GRS | 1.00%<br>(0.006-0.014)            | 0.024<br>(0.012-0.036) | 0.006<br>(7.81E-13) | 0.17%<br>(-0.001-0.005)           | 0.002<br>(-0.005-0.009) | 0.001<br>(0.055) |
| (m4)  | m1 + Socioeconomic Status                                  | 4.70%                             | 0.550                  |                     | 7.70%                             | 0.643                   |                  |
| (m5)  | m4 + Weighted GRS                                          | 6.20%                             | 0.586                  |                     | 7.92%                             | 0.645                   |                  |
|       | Change in predictiveness with addition of the weighted GRS | 1.50%<br>(0.010-0.020)            | 0.036<br>(0.023-0.050) | 0.010<br>(5.46E-19) | 0.22%<br>(-0.001-0.006)           | 0.002<br>(-0.003-0.008) | 0.002<br>(0.012) |

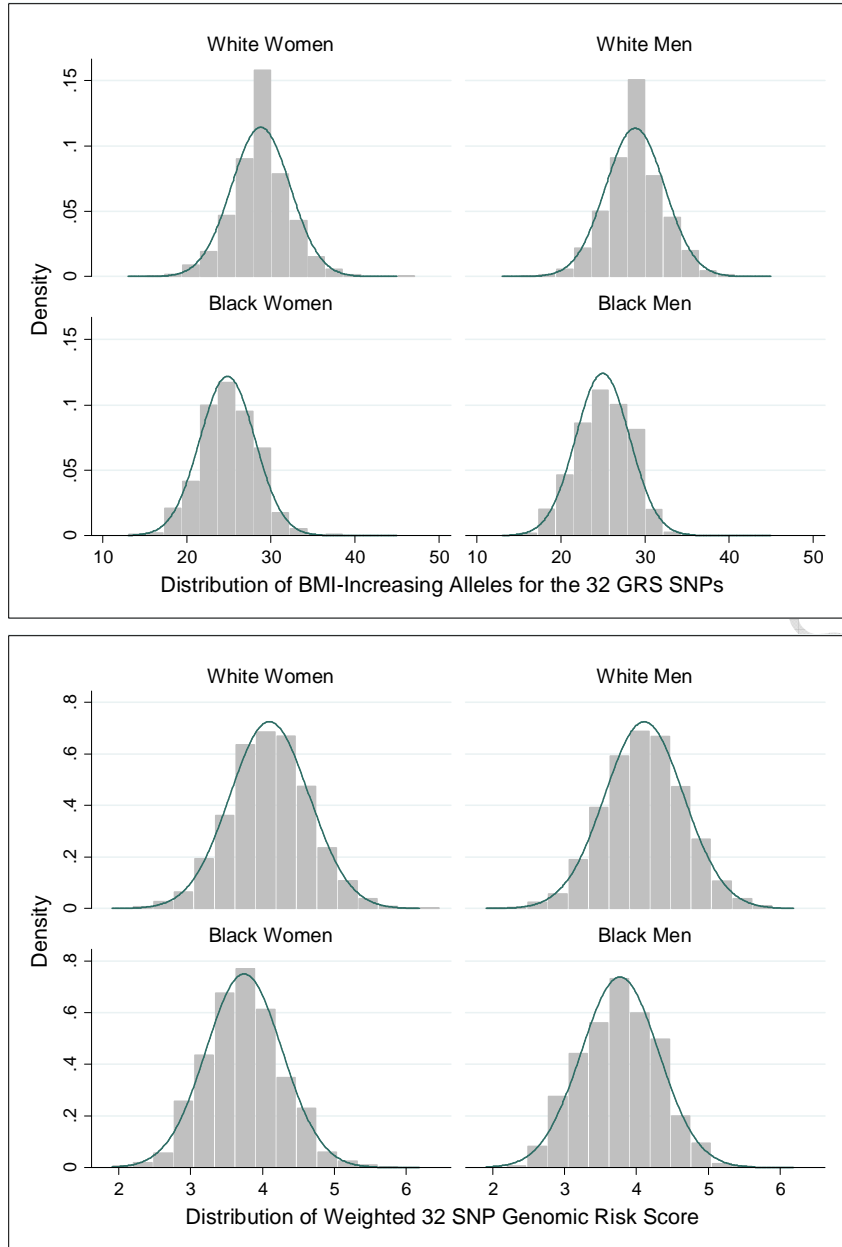

**Supplementary Figure 1. Distributions of BMI Increasing Alleles for the 32 GRS SNPs and the Weighted Obesity Genomic Risk Score Among White and African American ARIC Participants.** Variance of the obesity genomic risk scores (GRS) was similar among women and men within ethnicity ( $p > 0.15$  for both samples), but was greater among whites as compared to African Americans ( $p < 0.001$ ) according to Brown and Forsythe's (Brown and Forsythe 1974) test for equality of variances.

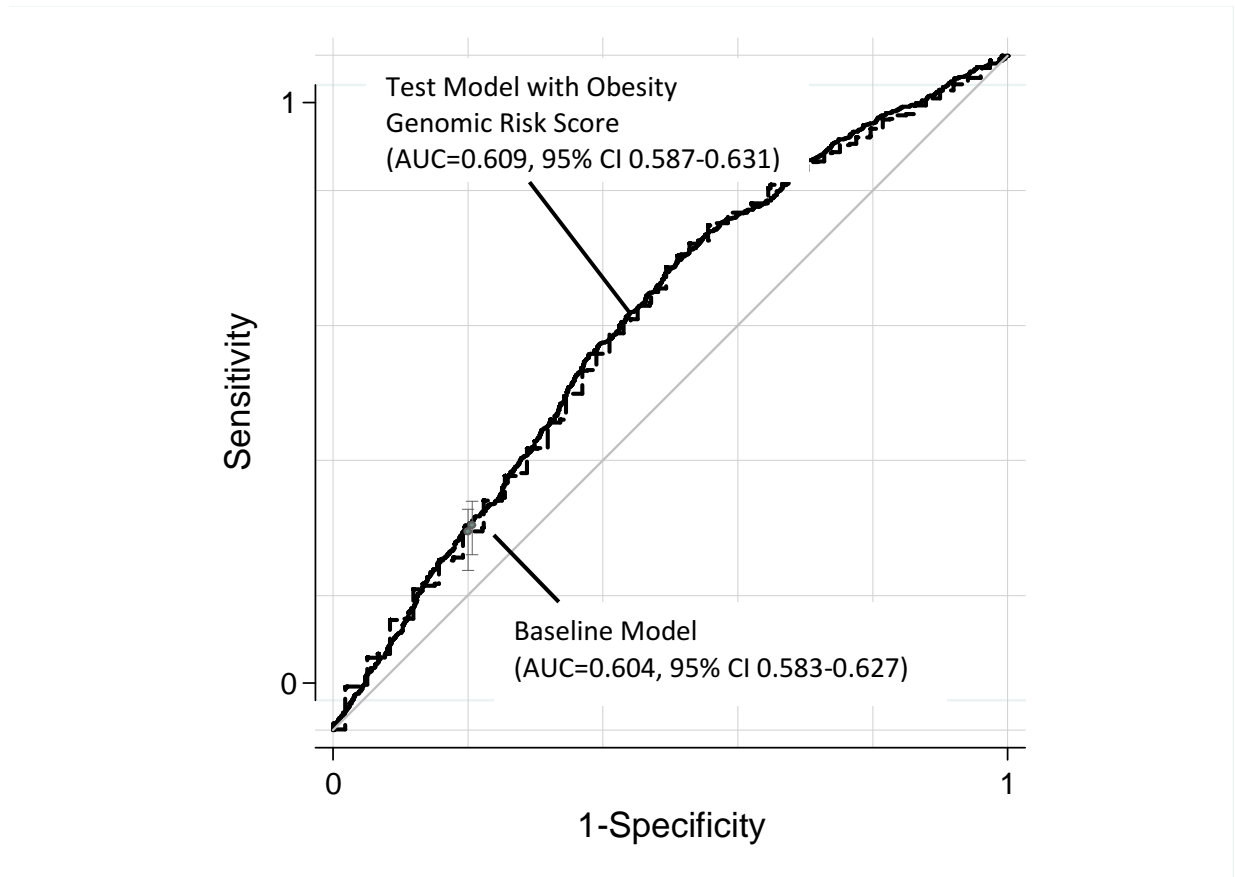

**Supplementary Figure 2. Receiver Operating Characteristic Curves for Obesity Among African American ARIC Participants (n=2,442).** Baseline Model = gender, age (quadratic), gender x age interaction, ARIC study center; Test Model = baseline model + weighted obesity genomic risk score. ROC Curves were constructed using predicted values from probit regressions of obesity (BMI $\geq$ 30) on the model terms. Delta AUC (AUC<sub>Test</sub>-AUC<sub>Baseline</sub>) = 0.005, 95% CI -0.005-0.015, p=0.30. Delta Partial AUC at 80% specificity=0, 95% CI -0.004-0.004, p=0.97. AUCs, partial AUCs, and delta AUCs were estimated using Pepe's method (Janes and Pepe 2009; Pepe, Longton, and Janes 2009).

## References

- Baltagi, B. H. 1980. On Seemingly Unrelated Regressions with Error-Components. *Econometrica* 48 (6):1547-1551.
- Brown, M. B., and A. B. Forsythe. 1974. Robust Tests for Equality of Variances. *Journal of the American Statistical Association* 69 (346):364-367.
- Cotsapas, C., E. K. Speliotes, I. J. Hatoum, D. M. Greenawalt, R. Dobrin, P. Y. Lum, C. Suver, E. Chudin, D. Kemp, M. Reitman, B. F. Voight, B. M. Neale, E. E. Schadt, J. N. Hirschhorn, L. M. Kaplan, and M. J. Daly. 2009. Common body mass index-associated variants confer risk of extreme obesity. *Human Molecular Genetics* 18 (18):3502-7.
- Fox, C. S., N. Heard-Costa, L. A. Cupples, J. Dupuis, R. S. Vasan, and L. D. Atwood. 2007. Genome-wide association to body mass index and waist circumference: the Framingham Heart Study 100K project. *BMC Medical Genetics* 8 Suppl 1:S18.
- Frayling, T. M., N. J. Timpson, M. N. Weedon, E. Zeggini, R. M. Freathy, C. M. Lindgren, J. R. Perry, K. S. Elliott, H. Lango, N. W. Rayner, B. Shields, L. W. Harries, J. C. Barrett, S. Ellard, C. J. Groves, B. Knight, A. M. Patch, A. R. Ness, S. Ebrahim, D. A. Lawlor, S. M. Ring, Y. Ben-Shlomo, M. R. Jarvelin, U. Sovio, A. J. Bennett, D. Melzer, L. Ferrucci, R. J. Loos, I. Barroso, N. J. Wareham, F. Karpe, K. R. Owen, L. R. Cardon, M. Walker, G. A. Hitman, C. N. Palmer, A. S. Doney, A. D. Morris, G. D. Smith, A. T. Hattersley, and M. I. McCarthy. 2007. A common variant in the FTO gene is associated with body mass index and predisposes to childhood and adult obesity. *Science* 316 (5826):889-94.
- GENEVA ARIC Project. 2009. Quality Control Report for the ARIC GWAS database. Bethesda, MD: The National Institutes of Health Database of Genotypes and Phenotypes (dbGaP).
- Heard-Costa, N. L., M. C. Zillikens, K. L. Monda, A. Johansson, T. B. Harris, M. Fu, T. Haritunians, M. F. Feitosa, T. Aspelund, G. Eiriksdottir, M. Garcia, L. J. Launer, A. V. Smith, B. D. Mitchell, P. F. McArdle, A. R. Shuldiner, S. J. Bielinski, E. Boerwinkle, F. Brancati, E. W. Demerath, J. S. Pankow, A. M. Arnold, Y. D. Chen, N. L. Glazer, B. McKnight, B. M. Psaty, J. I. Rotter, N. Amin, H. Campbell, U. Gyllenstein, C. Pattaro, P. P. Pramstaller, I. Rudan, M. Struchalin, V. Vitart, X. Gao, A. Kraja, M. A. Province, Q. Zhang, L. D. Atwood, J. Dupuis, J. N. Hirschhorn, C. E. Jaquish, C. J. O'Donnell, R. S. Vasan, C. C. White, Y. S. Aulchenko, K. Estrada, A. Hofman, F. Rivadeneira, A. G. Uitterlinden, J. C. Witteman, B. A. Oostra, R. C. Kaplan, V. Gudnason, J. R. O'Connell, I. B. Borecki, C. M. van Duijn, L. A. Cupples, C. S. Fox, and K. E. North. 2009. NRXN3 is a novel locus for waist circumference: a genome-wide association study from the CHARGE Consortium. *PLoS Genetics* 5 (6):e1000539.
- Herbert, A., N. P. Gerry, M. B. McQueen, I. M. Heid, A. Pfeufer, T. Illig, H. E. Wichmann, T. Meitinger, D. Hunter, F. B. Hu, G. Colditz, A. Hinney, J. Hebebrand, K. Koberwitz, X. Zhu, R. Cooper, K. Ardlie, H. Lyon, J. N. Hirschhorn, N. M. Laird, M. E. Lenburg, C. Lange, and M. F. Christman. 2006. A common genetic variant is associated with adult and childhood obesity. *Science* 312 (5771):279-83.
- Hindorf, L. A., P. Sethupathy, H. A. Junkins, E. M. Ramos, J. P. Mehta, F. S. Collins, and T. A. Manolio. 2009. Potential etiologic and functional implications of genome-wide association loci for human diseases and traits. *Proceedings of the National Academy of Sciences of the United States of America* 106 (23):9362-7.
- Hinney, A., T. T. Nguyen, A. Scherag, S. Friedel, G. Bronner, T. D. Muller, H. Grallert, T. Illig, H. E. Wichmann, W. Rief, H. Schafer, and J. Hebebrand. 2007. Genome wide association (GWA) study for early onset extreme obesity supports the role of fat mass and obesity associated gene (FTO) variants. *PLoS One* 2 (12):e1361.



- Janes, H., and M. S. Pepe. 2009. Adjusting for covariate effects on classification accuracy using the covariate-adjusted receiver operating characteristic curve. *Biometrika* 96 (2):371-382.
- Johansson, A., F. Marroni, C. Hayward, C. S. Franklin, A. V. Kirichenko, I. Jonasson, A. A. Hicks, V. Vitart, A. Isaacs, T. Axenovich, S. Campbell, J. Floyd, N. Hastie, S. Knott, G. Lauc, I. Pichler, K. Rotim, S. H. Wild, I. V. Zorkoltseva, J. F. Wilson, I. Rudan, H. Campbell, C. Pattaro, P. Pramstaller, B. A. Oostra, A. F. Wright, C. M. van Duijn, Y. S. Aulchenko, U. Gyllensten, and Eurospan Consortium. 2010. Linkage and genome-wide association analysis of obesity-related phenotypes: Association of weight with the MGAT1 gene. *Obesity* 18 (4):803-808.
- Li, S., J. H. Zhao, J. Luan, R. N. Luben, S. A. Rodwell, K. T. Khaw, K. K. Ong, N. J. Wareham, and R. J. Loos. 2010. Cumulative effects and predictive value of common obesity-susceptibility variants identified by genome-wide association studies. *American Journal of Clinical Nutrition* 91 (1):184-90.
- Lindgren, C. M., I. M. Heid, J. C. Randall, C. Lamina, V. Steinthorsdottir, L. Qi, E. K. Speliotes, G. Thorleifsson, C. J. Willer, B. M. Herrera, A. U. Jackson, N. Lim, P. Scheet, N. Soranzo, N. Amin, Y. S. Aulchenko, J. C. Chambers, A. Drong, J. A. Luan, H. N. Lyon, F. Rivadeneira, S. Sanna, N. J. Timpson, M. C. Zillikens, J. H. Zhao, P. Almgren, S. Bandinelli, A. J. Bennett, R. N. Bergman, L. L. Bonnycastle, S. J. Bumpstead, S. J. Chanock, L. Cherkas, P. Chines, L. Coin, C. Cooper, G. Crawford, A. Doering, A. Dominiczak, A. S. F. Doney, S. Ebrahim, P. Elliott, M. R. Erdos, K. Estrada, L. Ferrucci, G. Fischer, N. G. Forouhi, C. Gieger, H. Grallert, C. J. Groves, S. Grundy, C. Guiducci, D. Hadley, A. Hamsten, A. S. Havulinna, A. Hofman, R. Holle, J. W. Holloway, T. Illig, B. Isomaa, L. C. Jacobs, K. Jameson, P. Jousilahti, F. Karpe, J. Kuusisto, J. Laitinen, G. M. Lathrop, D. A. Lawlor, M. Mangino, W. L. McArdle, T. Meitinger, M. A. Morken, A. P. Morris, P. Munroe, N. Narisu, A. Nordstrom, P. Nordstrom, B. A. Oostra, C. N. A. Palmer, F. Payne, J. F. Peden, I. Prokopenko, F. Renstrom, A. Ruokonen, V. Salomaa, M. S. Sandhu, L. J. Scott, A. Scuteri, K. Silander, K. J. Song, X. Yuan, H. M. Stringham, A. J. Swift, T. Tuomi, M. Uda, P. Vollenweider, G. Waeber, C. Wallace, G. B. Walters, M. N. Weedon, J. C. M. Witteman, C. L. Zhang, W. H. Zhang, M. J. Caulfield, F. S. Collins, G. D. Smith, I. N. M. Day, P. W. Franks, A. T. Hattersley, F. B. Hu, M. R. Jarvelin, A. Kong, J. S. Kooner, M. Laakso, E. Lakatta, V. Mooser, A. D. Morris, L. Peltonen, N. J. Samani, T. D. Spector, D. P. Strachan, T. Tanaka, J. Tuomilehto, A. G. Uitterlinden, C. M. van Duijn, N. J. Wareham, H. Watkins, D. M. Waterworth, M. Boehnke, P. Deloukas, L. Groop, D. J. Hunter, U. Thorsteinsdottir, D. Schlessinger, H. E. Wichmann, T. M. Frayling, G. R. Abecasis, J. N. Hirschhorn, R. J. F. Loos, K. Stefansson, K. L. Mohlke, I. S. Barroso, M. I. McCarthy, Procardis Consortia Giant Wellcome Trust Case Control Consor, and Consortium. 2009. Genome-Wide association scan meta-analysis identifies three loci influencing adiposity and fat distribution. *PLoS Genetics* 5 (6):e1000508.
- Liu, J. Z., S. E. Medland, M. J. Wright, A. K. Henders, A. C. Heath, P. A. Madden, A. Duncan, G. W. Montgomery, N. G. Martin, and A. F. McRae. 2010. Genome-wide association study of height and body mass index in Australian twin families. *Twin Research and Human Genetics* 13 (2):179-93.
- Liu, Y. J., X. G. Liu, L. Wang, C. Dina, H. Yan, J. F. Liu, S. Levy, C. J. Papasian, B. M. Drees, J. J. Hamilton, D. Meyre, J. Delplanque, Y. F. Pei, L. Zhang, R. R. Recker, P. Froguel, and H. W. Deng. 2008. Genome-wide association scans identified CTNBL1 as a novel gene for obesity. *Human Molecular Genetics* 17 (12):1803-13.
- Loos, R. J., C. M. Lindgren, S. Li, E. Wheeler, J. H. Zhao, I. Prokopenko, M. Inouye, R. M. Freathy, A. P. Attwood, J. S. Beckmann, S. I. Berndt, K. B. Jacobs, S. J. Chanock, R. B. Hayes, S. Bergmann, A. J. Bennett, S. A. Bingham, M. Bochud, M. Brown, S. Cauchi, J. M. Connell, C. Cooper, G. D. Smith, I. Day, C. Dina, S. De, E. T. Dermizakis, A. S. Doney, K. S. Elliott, P. Elliott, D. M. Evans, I. Sadaf Farooqi, P. Froguel, J. Ghorri, C. J. Groves, R. Gwilliam, D. Hadley, A. S. Hall, A. T. Hattersley, J.

- Hebebrand, I. M. Heid, C. Lamina, C. Gieger, T. Illig, T. Meitinger, H. E. Wichmann, B. Herrera, A. Hinney, S. E. Hunt, M. R. Jarvelin, T. Johnson, J. D. Jolley, F. Karpe, A. Keniry, K. T. Khaw, R. N. Luben, M. Mangino, J. Marchini, W. L. McArdle, R. McGinnis, D. Meyre, P. B. Munroe, A. D. Morris, A. R. Ness, M. J. Neville, A. C. Nica, K. K. Ong, S. O'Rahilly, K. R. Owen, C. N. Palmer, K. Papadakis, S. Potter, A. Pouta, L. Qi, J. C. Randall, N. W. Rayner, S. M. Ring, M. S. Sandhu, A. Scherag, M. A. Sims, K. Song, N. Soranzo, E. K. Speliotes, H. E. Syddall, S. A. Teichmann, N. J. Timpson, J. H. Tobias, M. Uda, C. I. Vogel, C. Wallace, D. M. Waterworth, M. N. Weedon, C. J. Willer, Wraight, X. Yuan, E. Zeggini, J. N. Hirschhorn, D. P. Strachan, W. H. Ouwehand, M. J. Caulfield, N. J. Samani, T. M. Frayling, P. Vollenweider, G. Waeber, V. Mooser, P. Deloukas, M. I. McCarthy, N. J. Wareham, I. Barroso, P. Kraft, S. E. Hankinson, D. J. Hunter, F. B. Hu, H. N. Lyon, B. F. Voight, M. Ridderstrale, L. Groop, P. Scheet, S. Sanna, G. R. Abecasis, G. Albai, R. Nagaraja, D. Schlessinger, A. U. Jackson, J. Tuomilehto, F. S. Collins, M. Boehnke, and K. L. Mohlke. 2008. Common variants near MC4R are associated with fat mass, weight and risk of obesity. *Nature Genetics* 40 (6):768-75.
- Meyre, D., J. Delplanque, J. C. Chevre, C. Lecoeur, S. Lobbens, S. Gallina, E. Durand, V. Vatin, F. Degraeve, C. Proenca, S. Gaget, A. Korner, P. Kovacs, W. Kiess, J. Tichet, M. Marre, A. L. Hartikainen, F. Horber, N. Potoczna, S. Hercberg, C. Levy-Marchal, F. Pattou, B. Heude, M. Tauber, M. I. McCarthy, A. I. Blakemore, A. Montpetit, C. Polychronakos, J. Weill, L. J. Coin, J. Asher, P. Elliott, M. R. Jarvelin, S. Visvikis-Siest, B. Balkau, R. Sladek, D. Balding, A. Walley, C. Dina, and P. Froguel. 2009. Genome-wide association study for early-onset and morbid adult obesity identifies three new risk loci in European populations. *Nature Genetics* 41 (2):157-9.
- Pencina, M. J., R. B. D'Agostino, Sr., R. B. D'Agostino, Jr., and R. S. Vasan. 2008. Evaluating the added predictive ability of a new marker: from area under the ROC curve to reclassification and beyond. *Statistics in Medicine* 27 (2):157-72; discussion 207-12.
- Pepe, M., G. Longton, and H. Janes. 2009. Estimation and Comparison of Receiver Operating Characteristic Curves. *Stata Journal* 9 (1):1.
- Peterson, R. E., H. H. Maes, P. Holmans, A. R. Sanders, D. F. Levinson, J. Shi, K. S. Kendler, P. V. Gejman, and B. T. Webb. 2011. Genetic risk sum score comprised of common polygenic variation is associated with body mass index. *Human Genetics* 129 (2):221-30.
- Royston, P., and G. Ambler. 1999. Multivariable fractional polynomials: Update. In *Stata Technical Bulletin*. College Station, Tx: Stata.
- Royston, P., and W. Sauerbrei. 2003. Stability of multivariable fractional polynomial models with selection of variables and transformations: a bootstrap investigation. *Statistics in Medicine* 22 (4):639-59.
- Scherag, A., C. Dina, A. Hinney, V. Vatin, S. Scherag, C. I. Vogel, T. D. Muller, H. Grallert, H. E. Wichmann, B. Balkau, B. Heude, M. R. Jarvelin, A. L. Hartikainen, C. Levy-Marchal, J. Weill, J. Delplanque, A. Korner, W. Kiess, P. Kovacs, N. W. Rayner, I. Prokopenko, M. I. McCarthy, H. Schafer, I. Jarick, H. Boeing, E. Fisher, T. Reinehr, J. Heinrich, P. Rzehak, D. Berdel, M. Borte, H. Biebermann, H. Krude, D. Rosskopf, C. Rimbach, W. Rief, T. Fromme, M. Klingenspor, A. Schurmann, N. Schulz, M. M. Nothen, T. W. Muhleisen, R. Erbel, K. H. Jockel, S. Moebus, T. Boes, T. Illig, P. Froguel, J. Hebebrand, and D. Meyre. 2010. Two new Loci for body-weight regulation identified in a joint analysis of genome-wide association studies for early-onset extreme obesity in French and German study groups. *PLoS Genetics* 6 (4):e1000916.
- Scuteri, A., S. Sanna, W. M. Chen, M. Uda, G. Albai, J. Strait, S. Najjar, R. Nagaraja, M. Orru, G. Usala, M. Dei, S. Lai, A. Maschio, F. Busonero, A. Mulas, G. B. Ehret, A. A. Fink, A. B. Weder, R. S. Cooper, P. Galan, A. Chakravarti, D. Schlessinger, A. Cao, E. Lakatta, and G. R. Abecasis. 2007. Genome-wide association scan shows genetic variants in the FTO gene are associated with obesity-related traits. *PLoS Genetics* 3 (7):1200-1210.

Speliotes, E. K., C. J. Willer, S. I. Berndt, K. L. Monda, G. Thorleifsson, A. U. Jackson, H. L. Allen, C. M. Lindgren, J. Luan, R. Magi, J. C. Randall, S. Vedantam, T. W. Winkler, L. Qi, T. Workalemahu, I. M. Heid, V. Steinthorsdottir, H. M. Stringham, M. N. Weedon, E. Wheeler, A. R. Wood, T. Ferreira, R. J. Weyant, A. V. Segre, K. Estrada, L. Liang, J. Nemes, J. H. Park, S. Gustafsson, T. O. Kilpelainen, J. Yang, N. Bouatia-Naji, T. Esko, M. F. Feitosa, Z. Kutalik, M. Mangino, S. Raychaudhuri, A. Scherag, A. V. Smith, R. Welch, J. H. Zhao, K. K. Aben, D. M. Absher, N. Amin, A. L. Dixon, E. Fisher, N. L. Glazer, M. E. Goddard, N. L. Heard-Costa, V. Hoesel, J. J. Hottenga, A. Johansson, T. Johnson, S. Ketkar, C. Lamina, S. Li, M. F. Moffatt, R. H. Myers, N. Narisu, J. R. Perry, M. J. Peters, M. Preuss, S. Ripatti, F. Rivadeneira, C. Sandholt, L. J. Scott, N. J. Timpson, J. P. Tyrer, S. van Wingerden, R. M. Watanabe, C. C. White, F. Wiklund, C. Barlassina, D. I. Chasman, M. N. Cooper, J. O. Jansson, R. W. Lawrence, N. Pellikka, I. Prokopenko, J. Shi, E. Thiering, H. Alavere, M. T. Alibrandi, P. Almgren, A. M. Arnold, T. Aspelund, L. D. Atwood, B. Balkau, A. J. Balmforth, A. J. Bennett, Y. Ben-Shlomo, R. N. Bergman, S. Bergmann, H. Biebermann, A. I. Blakemore, T. Boes, L. L. Bonnycastle, S. R. Bornstein, M. J. Brown, T. A. Buchanan, F. Busonero, H. Campbell, F. P. Cappuccio, C. Cavalcanti-Proenca, Y. D. Chen, C. M. Chen, P. S. Chines, R. Clarke, L. Coin, J. Connell, I. N. Day, M. Heijer, J. Duan, S. Ebrahim, P. Elliott, R. Elosua, G. Eiriksdottir, M. R. Erdos, J. G. Eriksson, M. F. Facheris, S. B. Felix, P. Fischer-Posovszky, A. R. Folsom, N. Friedrich, N. B. Freimer, M. Fu, S. Gaget, P. V. Gejman, E. J. Geus, C. Gieger, A. P. Gjesing, A. Goel, P. Goyette, H. Grallert, J. Grasser, D. M. Greenawalt, C. J. Groves, V. Gudnason, C. Guiducci, A. L. Hartikainen, N. Hassanali, A. S. Hall, A. S. Havulinna, C. Hayward, A. C. Heath, C. Hengstenberg, A. A. Hicks, A. Hinney, A. Hofman, G. Homuth, J. Hui, W. Igl, C. Iribarren, B. Isomaa, K. B. Jacobs, I. Jarick, E. Jewell, U. John, T. Jorgensen, P. Jousilahti, A. Jula, M. Kaakinen, E. Kajantie, L. M. Kaplan, S. Kathiresan, J. Kettunen, L. Kinnunen, J. W. Knowles, I. Kolcic, I. R. Konig, S. Koskinen, P. Kovacs, J. Kuusisto, P. Kraft, K. Kvaloy, J. Laitinen, O. Lantieri, C. Lanzani, L. J. Launer, C. Lecoeur, T. Lehtimaki, G. Lettre, J. Liu, M. L. Lokki, M. Lorentzon, R. N. Luben, B. Ludwig, P. Manunta, D. Marek, M. Marre, N. G. Martin, W. L. McArdle, A. McCarthy, B. McKnight, T. Meitinger, O. Melander, D. Meyre, K. Midthjell, G. W. Montgomery, M. A. Morken, A. P. Morris, R. Mulic, J. S. Ngwa, M. Nelis, M. J. Neville, D. R. Nyholt, C. J. O'Donnell, S. O'Rahilly, K. K. Ong, B. Oostra, G. Pare, A. N. Parker, M. Perola, I. Pichler, K. H. Pietilainen, C. G. Platou, O. Polasek, A. Pouta, S. Rafelt, O. Raitakari, N. W. Rayner, M. Ridderstrale, W. Rief, A. Ruukonen, N. R. Robertson, P. Rzehak, V. Salomaa, A. R. Sanders, M. S. Sandhu, S. Sanna, J. Saramies, M. J. Savolainen, S. Scherag, S. Schipf, S. Schreiber, H. Schunkert, K. Silander, J. Sinisalo, D. S. Siscovick, J. H. Smit, N. Soranzo, U. Sovio, J. Stephens, I. Surakka, A. J. Swift, M. L. Tammesoo, J. C. Tardif, M. Teder-Laving, T. M. Teslovich, J. R. Thompson, B. Thomson, A. Tonjes, T. Tuomi, J. B. van Meurs, G. J. van Ommen, V. Vatin, J. Viikari, S. Visvikis-Siest, V. Vitart, C. I. Vogel, B. F. Voight, L. L. Waite, H. Wallaschofski, G. B. Walters, E. Widen, S. Wiegand, S. H. Wild, G. Willemsen, D. R. Witte, J. C. Wittteman, J. Xu, Q. Zhang, L. Zgaga, A. Ziegler, P. Zitting, J. P. Beilby, I. S. Farooqi, J. Hebebrand, H. V. Huikuri, A. L. James, M. Kahonen, D. F. Levinson, F. Macciardi, M. S. Nieminen, C. Ohlsson, L. J. Palmer, P. M. Ridker, M. Stumvoll, J. S. Beckmann, H. Boeing, E. Boerwinkle, D. I. Boomsma, M. J. Caulfield, S. J. Chanock, F. S. Collins, L. A. Cupples, G. D. Smith, J. Erdmann, P. Froguel, H. Gronberg, U. Gyllensten, P. Hall, T. Hansen, T. B. Harris, A. T. Hattersley, R. B. Hayes, J. Heinrich, F. B. Hu, K. Hveem, T. Illig, M. R. Jarvelin, J. Kaprio, F. Karpe, K. T. Khaw, L. A. Kiemeny, H. Krude, M. Laakso, D. A. Lawlor, A. Metspalu, P. B. Munroe, W. H. Ouwehand, O. Pedersen, B. W. Penninx, A. Peters, P. P. Pramstaller, T. Quertermous, T. Reinehr, A. Rissanen, I. Rudan, N. J. Samani, P. E. Schwarz, A. R. Shuldiner, T. D. Spector, J. Tuomilehto, M. Uda, A. Uitterlinden, T. T. Valle, M. Wabitsch, G. Waeber, N. J. Wareham, H. Watkins, J. F. Wilson, A. F. Wright, M. C. Zillikens, N. Chatterjee, S. A. McCarroll, S. Purcell, E. E. Schadt, P. M. Visscher, T. L. Assimes, I. B. Borecki, P. Deloukas, C. S. Fox, L. C. Groop, T. Haritunians, D. J. Hunter, R. C. Kaplan, K. L.

- Mohlke, J. R. O'Connell, L. Peltonen, D. Schlessinger, D. P. Strachan, C. M. van Duijn, H. E. Wichmann, T. M. Frayling, U. Thorsteinsdottir, G. R. Abecasis, I. Barroso, M. Boehnke, K. Stefansson, K. E. North, M. I. McCarthy, J. N. Hirschhorn, E. Ingelsson, and R. J. Loos. 2010. Association analyses of 249,796 individuals reveal 18 new loci associated with body mass index. *Nature Genetics* 42 (11):937-48.
- Thorleifsson, G., G. B. Walters, D. F. Gudbjartsson, V. Steinthorsdottir, P. Sulem, A. Helgadóttir, U. Styrkarsdóttir, S. Gretarsdóttir, S. Thorlacius, I. Jonsdóttir, T. Jonsdóttir, E. J. Olafsdóttir, G. H. Olafsdóttir, T. Jonsson, F. Jonsson, K. Borch-Johnsen, T. Hansen, G. Andersen, T. Jorgensen, T. Lauritzen, K. K. Aben, A. L. Verbeek, N. Roeleveld, E. Kampman, L. R. Yanek, L. C. Becker, L. Tryggvadóttir, T. Rafnar, D. M. Becker, J. Gulcher, L. A. Kiemeny, O. Pedersen, A. Kong, U. Thorsteinsdóttir, and K. Stefansson. 2009. Genome-wide association yields new sequence variants at seven loci that associate with measures of obesity. *Nature Genetics* 41 (1):18-24.
- Verzilli, C. J., N. Stallard, and J. C. Whittaker. 2005. Bayesian modelling of multivariate quantitative traits using seemingly unrelated regressions. *Genetic Epidemiology* 28 (4):313-25.
- Willer, C. J., E. K. Speliotes, R. J. Loos, S. Li, C. M. Lindgren, I. M. Heid, S. I. Berndt, A. L. Elliott, A. U. Jackson, C. Lamina, G. Lettre, N. Lim, H. N. Lyon, S. A. McCarroll, K. Papadakis, L. Qi, J. C. Randall, R. M. Ruccasecca, S. Sanna, P. Scheet, M. N. Weedon, E. Wheeler, J. H. Zhao, L. C. Jacobs, I. Prokopenko, N. Soranzo, T. Tanaka, N. J. Timpson, P. Almgren, A. Bennett, R. N. Bergman, S. A. Bingham, L. L. Bonnycastle, M. Brown, N. P. Burtt, P. Chines, L. Coin, F. S. Collins, J. M. Connell, C. Cooper, G. D. Smith, E. M. Dennison, P. Deodhar, P. Elliott, M. R. Erdos, K. Estrada, D. M. Evans, L. Gianniny, C. Gieger, C. J. Gillson, C. Guiducci, R. Hackett, D. Hadley, A. S. Hall, A. S. Havulinna, J. Hebebrand, A. Hofman, B. Isomaa, K. B. Jacobs, T. Johnson, P. Jousilahti, Z. Jovanovic, K. T. Khaw, P. Kraft, M. Kuokkanen, J. Kuusisto, J. Laitinen, E. G. Lakatta, J. Luan, R. N. Luben, M. Mangino, W. L. McArdle, T. Meitinger, A. Mulas, P. B. Munroe, N. Narisu, A. R. Ness, K. Northstone, S. O'Rahilly, C. Purmann, M. G. Rees, M. Ridderstrale, S. M. Ring, F. Rivadeneira, A. Ruukonen, M. S. Sandhu, J. Saramies, L. J. Scott, A. Scuteri, K. Silander, M. A. Sims, K. Song, J. Stephens, S. Stevens, H. M. Stringham, Y. C. Tung, T. T. Valle, C. M. Van Duijn, K. S. Vimalaswaran, P. Vollenweider, G. Waeber, C. Wallace, R. M. Watanabe, D. M. Waterworth, N. Watkins, J. C. Witteman, E. Zeggini, G. Zhai, M. C. Zillikens, D. Altshuler, M. J. Caulfield, S. J. Chanock, I. S. Farooqi, L. Ferrucci, J. M. Guralnik, A. T. Hattersley, F. B. Hu, M. R. Jarvelin, M. Laakso, V. Mooser, K. K. Ong, W. H. Ouwehand, V. Salomaa, N. J. Samani, T. D. Spector, T. Tuomi, J. Tuomilehto, M. Uda, A. G. Uitterlinden, N. J. Wareham, P. Deloukas, T. M. Frayling, L. C. Groop, R. B. Hayes, D. J. Hunter, K. L. Mohlke, L. Peltonen, D. Schlessinger, D. P. Strachan, H. E. Wichmann, M. I. McCarthy, M. Boehnke, I. Barroso, G. R. Abecasis, and J. N. Hirschhorn. 2009. Six new loci associated with body mass index highlight a neuronal influence on body weight regulation. *Nature Genetics* 41 (1):25-34.
